# Supplementary material for: Low avidity T cells drive endogenous tumor immunity in mice and humans
Source: Research Square preprint supplement (doi:10.21203/rs.3.rs-3903457/v1), 2024-04-04
Supplement: Supplementary file 1 [file b31b2a01b321e58a8dbf38e6.xlsx]

## Sheet: Sheet1
NK-Like		Stem-Like		Eff-Exh		Term-Exh-1		Term-Exh-2
Upregulated	Downregulated	Upregulated	Downregulated	Upregulated	Downregulated	Upregulated	Downregulated	Upregulated	Downregulated
4930417O13Rik	2410006H16Rik	1110038B12Rik	1700017B05Rik	2410006H16Rik	2310011J03Rik	1810037I17Rik	2410006H16Rik	1700017B05Rik	1810037I17Rik
A330023F24Rik	5430416N02Rik	1700019D03Rik	1810037I17Rik	2900026A02Rik	4833439L19Rik	AA467197	Ablim1	Actg1	A530040E14Rik
AU020206	Actg1	2310001H17Rik	2900026A02Rik	5430416N02Rik	4930417O13Rik	AW112010	Ankrd11	Aebp2	AW112010
AW112010	Actn1	4930523C07Rik	AA467197	AI413582	4930469K13Rik	Acadl	Arf4	Airn	Arap2
Abracl	Airn	Abce1	AW112010	Abcb1a	4930523C07Rik	Acot7	Arhgef3	Anxa2	Atox1
Ahnak	Arl14ep	Actn1	Abcb1a	Abcb9	9530068E07Rik	Acot9	Bcl2	Arf4	Atp5e
Akt2	Arrb2	Adipor2	Abcb1b	Airn	AA467197	Actb	Birc3	Arl6ip1	Atp5j
Alcam	Atp5g2	Adk	Abcb9	Arpp19	AI467606	Actg1	Bst2	Arnt	Atp5j2
Aldoa	Atp5mpl	Aff3	Abr	Atp5e	Aamp	Adam8	Btg1	Arpc3	Atp5k
Amfr	Bcl2	Akap13	Acadl	Atp5g2	Abcc1	Adgrg3	Camk1d	Arpc5	Atp5l
Ankrd44	Bex3	Alcam	Actg1	Atp5j2	Abhd2	Adipor1	Ccl4	Atp10a	Atp5md
Anxa1	Birc2	Anp32a	Actr1b	Atp5k	Abracl	Agpat4	Ccl5	Atp5b	Atp5mpl
Aopep	Birc3	Anp32b	Ada	Atp5md	Acadvl	Akt1	Ccr2	Atp5f1	Atp6v0e
Ap2m1	Bmp2k	Anp32e	Airn	Atp5mpl	Acbd3	Aldoa	Ccr5	Atp6v1b2	B2m
Arap2	Btf3	Anxa1	Anxa6	Bcl2	Acot7	Ankrd37	Cd69	Atp8b4	Bcl2
Arf1	C1qbp	Anxa5	Aopep	Bcl2l11	Acot9	Anxa1	Cd7	Atxn1	Bola2
Armc7	Calhm6	Ap3b1	Apaf1	Bex3	Acpp	Anxa2	Cd86	Baz1a	Btg2
Arpc1b	Ccrl2	Apbb1ip	Arf5	Birc3	Acsl4	Anxa5	Cebpb	Bex3	Capg
Arpc2	Cct2	Apex1	Arhgap9	Bloc1s1	Acsl5	Ar	Cotl1	Birc2	Ccnd2
Atp2b1	Cct5	Arap2	Arhgdib	Bola2	Actb	Areg	Ctsw	Btbd9	Ccnd3
Atp5h	Cd55	Arf6	Arhgef6	Bst2	Actn1	Arf3	Dennd4a	Btf3	Ccr1
Atp6v0c	Cd80	Arhgap26	Arl6ip1	Btf3	Actr1a	Arf5	Dnaja1	Carnmt1	Cd52
Atp6v0e	Cdk6	Arhgef3	Armc7	Ccr5	Adam8	Arhgap18	Dnajb1	Cblb	Cd53
B2m	Cebpb	Arl3	Arpc1b	Ccrl2	Adgre5	Arhgap21	Dusp1	Ccl5	Cemip2
BC031181	Cenpw	Arl4c	Arpc2	Cd52	Adipor1	Arl14ep	Dusp2	Ccr5	Cish
Bcl2a1b	Cep41	Arl4d	Arpc3	Cd55	Adipor2	Arl6ip1	Eif1	Ccrl2	Cmss1
Bcl2a1d	Cers4	Arl5c	Arpc5	Cebpb	Adk	Arl8a	Eif4a1	Cct4	Cnih2
Btg1	Chchd10	Arl6ip6	Arrb2	Chn2	Adora2a	Arpc1b	Evl	Cct8	Cox17
Btg2	Cmtm7	Asap1	Arsb	Cmss1	Aebp2	Arpc2	Fam49b	Cd247	Cox6c
Btg3	Coro1a	Asf1a	Atp5c1	Cox5b	Aff1	Arpc3	Fau	Cd27	Cox7a2
Cab39	Ctla2a	Ash1l	Atp5d	Cox6c	Agpat1	Arpc5	Gadd45b	Cd7	Cox7c
Calm1	Ctsw	Ass1	Atp5e	Cox7c	Agpat4	Asph	Gas5	Cdk6	Crip1
Calm2	Dapk2	Atf3	Atp5l	Cox8a	Ahnak	Atp5l	Gimap4	Cfl1	Cst3
Camk2n1	Dclre1c	Atl3	Atp5md	Ctla2a	Aimp2	Atp6v0e	Gimap5	Chchd10	Cst7
Camk4	Ddit4	Atp1a1	Atp6v1e1	Ctsw	Akap13	B4galnt1	Gimap7	Chp1	Dpm3
Cap1	Dennd4a	Atp1b3	Auh	Dapk2	Akirin1	Bcr	Gm10260	Chst12	Elob
Capg	Dgkh	Atp2b1	B2m	Dennd4a	Akirin2	CAAA01147332.1	Gm156	Ciapin1	Fau
Capza2	Dock9	Atp2b2	Bcr	Dnaja1	Akt1	Calm3	Gm42418	Clasp2	Fgl2
Ccl3	Dscam	Atp5a1	Bex3	Dpp4	Akt2	Camk2n1	Gna13	Cmip	Fkbp1a
Ccl5	Eef1a1	Atp5b	Birc2	Dusp1	Alcam	Camk4	Gramd1b	Cmtm7	Fxyd5
Ccnd2	Eef1b2	Atp5g1	Bmp2k	Eif3f	Aldoa	Capg	Grap2	Cnbp	Gimap4
Ccni	Eef1g	B3gnt2	Borcs8	Eif3k	Alkbh5	Capn2	Gzmk	Cntln	Gipc2
Ccr2	Eef2	Bach2	Bscl2	Elob	Amfr	Ccdc184	H3f3b	Coro1a	Gm11808
Cd164	Eif2ak3	Banf1	Bspry	Fau	Anapc2	Ccni	Hmgb1	Crbn	Gm19585
Cd200	Eif3e	Batf	Calm3	Fgl2	Ankrd13a	Ccr1	Hnrnpa0	Creb3l2	Gm2682
Cd226	Eif3f	Bcl2a1b	Camk2n1	Fkbp3	Ankrd39	Cd200	Hnrnpa3	Crem	Gm36723
Cd28	Eif3k	Bcl2a1d	Cblb	Gas5	Ankrd40	Cd27	Hnrnpd	Ctla4	Gm42047
Cd3d	Eif3m	Bcl6	Ccl5	Gimap3	Ankrd44	Cd3e	Hnrnpdl	Cyth4	Gm42418
Cd3e	Elmsan1	Bdh2	Ccnc	Gimap4	Ankrd46	Cd3g	Hsp90aa1	Ddx5	Gng5
Cd3g	Eno3	Bmyc	Ccr5	Gimap5	Anxa1	Cd53	Hsp90ab1	Dennd4a	Gzmb
Cd44	Epas1	Bsg	Ccrl2	Gimap6	Anxa2	Cd80	Hspa1a	Dgat1	Gzmd
Cd52	Epb41l4aos	Btg2	Cd244a	Gimap7	Anxa5	Cd96	Hspa1b	Dnajb6	Gzme
Cd53	Fbl	C1qbp	Cd27	Glrx	Ap2m1	Cdc42se1	Hspa8	Dock10	Gzmf
Cd8a	Fdx1	Cacybp	Cd38	Gm10260	Ap3b1	Cdkn1a	Hspd1	Dr1	H2-D1
Cd8b1	Fkbp3	Capg	Cd3e	Gm11808	Ar	Cenpa	Hspe1	Dynll2	Ifitm1
Cdc42	Gabrr1	Casp4	Cd3g	Gm156	Arap2	Cfap77	Ier2	Edem1	Ifitm2
Cfap77	Gas5	Ccl1	Cd52	Gm42418	Areg	Chp1	Ier5l	Eef1a1	Ifitm3
Cflar	Gldc	Ccn4	Cd8b1	Gpr183	Arf1	Ciapin1	Ifi208	Eef2	Il2rg
Chd4	Gm10260	Ccnd2	Cdc42se1	Gramd3	Arf3	Clcf1	Ifi214	Ehd1	Il7r
Cish	Gm11361	Ccr7	Cdk6	Gstp1	Arf5	Cnn2	Ifi27l2a	Eif2ak3	Inpp4b
Clcf1	Gm11808	Ccr8	Cebpb	Gzmk	Arhgap12	Cox17	Ikzf3	Eif3a	Itga1
Cmss1	Gm156	Cct2	Cenpa	H3f3b	Arhgap18	Cox4i1	Irf1	Eif3d	Itm2b
Cnih2	Gmfg	Cct3	Cetn2	Hcst	Arhgap21	Cox5a	Itga4	Eif3e	Jaml
Cox8a	Gpd2	Cct4	Cfl1	Hist1h1e	Arl1	Creb3l2	Itgb1	Eif3f	Klrd1
Crip1	Gpr18	Cct5	Chchd10	Hmgb1	Arl15	Crem	Itpkb	Eif3h	Lgals3
Crlf2	Gpr183	Cct6a	Chn2	Hmgb2	Arl4d	Crlf2	Limd2	Eif4a1	Lsamp
Csf1	Gramd1b	Cct8	Chpt1	Hsp90aa1	Arl8a	Cst3	Malat1	Eif4h	Ly6a
Csnk2b	Gstp1	Cd160	Chst12	Hsp90ab1	Arnt	Cst7	Mir142hg	Ell2	Ly6c1
Cst7	Gstp3	Cd200	Chsy1	Hspa1a	Arntl	Ctdnep1	Mndal	Emd	Ly6c2
Ctsa	Gtf2i	Cd44	Ciapin1	Hspa1b	Arpc1b	Ctsd	Myc	Emsy	Mdh2
Ctsb	Gzmd	Cd53	Clic1	Hspe1	Arpc3	Cxcr6	Ncf1	Entpd1	Mrpl52
Ctsd	Gzme	Cd69	Clta	Hspe1-rs1	Arpc5	Cyba	Ncl	Epas1	Ms4a4c
Cxcr6	Gzmf	Cd70	Cmip	Hsph1	Ash1l	Cytip	Ndufa4	Ets1	Myl6
Cycs	Hacd3	Cd81	Cmtm7	Ier2	Asph	D16Ertd472e	Nfkbia	Ezr	Ndufa1
Cytip	Hells	Cd82	Cnn2	Ier5l	Atf6b	Def6	Nfkbid	Fam13b	Ndufa2
D16Ertd472e	Hnrnpa1	Cd83	Cnp	Ifi203	Atp10a	Degs1	Npc2	Fam174b	Ndufa3
Dap	Hnrnpa3	Cd84	Coro1a	Ifi208	Atp1a1	Dgat1	Npm1	Fli1	Ndufb1-ps
Diaph1	Hsp90aa1	Cd9	Cox4i1	Ifi27l2a	Atp1b3	Dnajb4	Nr4a1	Flna	Ndufs5
Dlg2	Hsp90ab1	Cep85l	Cox5a	Ikzf2	Atp2a2	Dnajc1	Osgin1	Foxo1	Ndufv3
Dnajc1	Hspa8	Cflar	Cox5b	Impact	Atp2b2	Dock8	Pdcd4	Fryl	Neurl3
Dnajc15	Hspd1	Chd3	Cox6c	Inpp5d	Atp5b	Dscam	Pmepa1	Fth1	Nkg7
Dusp10	Hspe1	Chd4	Cox8a	Irak2	Atp6ap1	Dubr	Pnrc1	Gabpb1	Nrgn
Dusp2	Hspe1-rs1	Cish	Crbn	Irf1	Atp6v0a2	Dusp16	Prdx6	Gak	Ost4
Dusp4	Hsph1	Cldnd1	Crem	Isg15	Atp6v0c	E330009J07Rik	Prkch	Galnt18	Pdcd1lg2
Dusp5	Icam1	Clec2d	Crot	Itga4	Atp6v0e	Eaf1	Psme1	Galnt2	Plac8
Ece1	Ier5l	Cmah	Cst7	Klre1	Atp6v1c1	Ece1	Ptma	Gas5	Ppic
Ehd1	Ifitm2	Cnih2	Ctla2a	Lax1	Atrnl1	Edf1	Rpl10a	Gdi2	Ptpn18
Eif1	Ifitm3	Cpd	Ctla2b	Lilrb4a	Atxn1	Efhd2	Rpl12	Gjb2	Ramp1
Elf4	Igfbp7	Cpne3	Ctla4	Ltb	Avpi1	Egln1	Rpl13	Gldc	Rnasek
Elmo1	Ikzf2	Crabp2	Ctsc	Ly6c2	Axin1	Eif3h	Rpl14	Glis1	Romo1
Elob	Impa2	Crip1	Ctsd	Malat1	B3gnt2	Elmo2	Rpl18	Glrx	Rpl21
Ephx1	Irak2	Crip2	Cuta	Malt1	B4galnt1	Eno1	Rpl18a	Gls	Rpl22
Errfi1	Itga4	Crtam	Cxcr6	Mctp2	B9d2	Epas1	Rpl19	Gm11361	Rpl30
Ets1	Itgb1	Cse1l	Dapk2	Mir142hg	Bach2	Epdr1	Rpl21	Gm31597	Rpl31
Fam174a	Itpkb	Csf2	Dazap2	Mndal	Bag6	Ets1	Rpl22	Gm35082	Rpl34
Fgl2	Itpr1	Ctsw	Dclre1c	Mrpl52	Bcl2a1b	Exph5	Rpl24	Gm47015	Rpl35
Fhl2	Keap1	Ctsz	Ddit3	Mxd1	Bcl2a1c	Fcrl6	Rpl27a	Gm8909	Rpl35a
Filip1	Ltb	Cxcr3	Def6	Naca	Bcl2a1d	Filip1	Rpl31	Gna13	Rpl36
Fkbp1a	Magoh	Cycs	Dnajb6	Nfkbia	Bcl2l1	Fis1	Rpl32	Gnb4	Rpl36a
Fmnl1	Malt1	Dad1	Dock10	Npc2	Bhlhe40	Fkbp1a	Rpl35	Gpbp1	Rpl37
Foxn3	Maml2	Dapl1	Dock8	Nr4a2	Bmt2	Fkbp8	Rpl35a	Gpd2	Rpl37a
Fxyd5	Mif	Dbi	Dock9	Nsa2	Bsdc1	Fli1	Rpl36	Gpr160	Rpl38
Fyn	Mif4gd	Ddx21	Dusp16	Osgin1	Bsg	Fxyd5	Rpl36a	Gpr183	Rpl39
Gabarap	Mrpl23	Ddx3x	Dynll2	Pglyrp1	Btg3	Gabrr1	Rpl36al	Gsto1	Rpl41
Gabarapl2	Mrpl24	Ddx5	E330009J07Rik	Phf11b	CAAA01147332.1	Galnt18	Rpl37	Gstp3	Rplp2
Gapdh	Mrpl30	Dennd5a	Ech1	Plac8	Cab39	Gapdh	Rpl38	Gtf2i	Rps21
Gbp4	Nab1	Denr	Edf1	Prkch	Calcoco1	Gatad2a	Rpl39	H13	Rps24
Gbp6	Naca	Dnajc1	Eef1a1	Psmb10	Calm1	Gem	Rpl41	H2-Q4	Rps25
Gem	Nap1l1	Dnmt3a	Efhd2	Psme1	Calm3	Gipc2	Rpl6	H2-Q6	Rps26
Gimap4	Nbdy	Dse	Eid1	Ptma	Calr	Gldc	Rpl7a	Hacd3	Rps27
Gimap5	Nfkbia	Dusp4	Eif2ak3	Ptpn18	Camk2n1	Glipr1	Rpl8	Hip1r	Rps27a
Glud1	Nme2	E130308A19Rik	Eif3f	Ptprcap	Camk4	Gm20400	Rpl9	Hivep1	Rps28
Gm19585	Nop58	E430024P14Rik	Eif4e3	Rbm3	Capg	Gm36723	Rplp0	Hnrnpa1	Rps29
Gm2a	Npm1	Ece1	Entpd1	Rpl10	Capn1	Gm4022	Rplp1	Hnrnpa2b1	S100a10
Gm36723	Npm3	Eea1	Epas1	Rpl10a	Capn2	Gm42047	Rplp2	Hnrnpa3	S100a13
Gm8369	Nr4a2	Eef1e1	Epb41	Rpl11	Capns1	Gmfg	Rps10	Hnrnpl	S100a6
Gm8909	Nsa2	Eef1g	Epdr1	Rpl12	Capza1	Gna15	Rps13	Hspa4	Sat1
Gnai2	Ogt	Ehd3	Epsti1	Rpl13	Capza2	Gnai2	Rps15	Ier5l	Sec61g
Gnb5	Osgin1	Eif2s2	Esyt1	Rpl13a	Capzb	Gnb1	Rps16	Ifngr1	Sem1
Gng5	Park7	Eif3c	Eva1b	Rpl14	Ccdc127	Gng2	Rps19	Ifrd1	Serf2
Got1	Pcyt1a	Eif3i	Fasl	Rpl17	Ccdc184	Gpr162	Rps2	Igf2r	Serpinb9b
Gpm6b	Pebp1	Eif4a1	Fau	Rpl18	Ccl1	Gpx4	Rps20	Ighm	Serpine2
Gpr174	Pex16	Eif4g1	Fcrl6	Rpl18a	Ccl3	Grcc10	Rps21	Igsf5	Sh3bgrl3
Gpx1	Phgdh	Eif5a	Fdx1	Rpl19	Ccnc	Gstm5	Rps24	Ikzf3	Skap1
Grcc10	Pkp4	Eif6	Fermt3	Rpl21	Ccnd2	Gzmb	Rps27	Il21r	Slamf7
Gtdc1	Plscr1	Elk4	Fgl2	Rpl22	Ccng2	Gzmc	Rps27a	Il2rb	Slfn2
Gzmb	Plxnc1	Elmo1	Filip1	Rpl22l1	Ccni	Gzmd	Rps28	Impa2	Snrpg
Gzmk	Ppid	Emb	Fis1	Rpl23	Ccnk	Gzme	Rps29	Impdh2	Sp140
H2-D1	Prmt3	Emp1	Fkbp8	Rpl23a	Ccr1	Gzmf	Rps3	Ipo7	Spp1
H2-K1	Prpf4b	Emp3	Fli1	Rpl24	Ccr7	Gzmg	Rps5	Irak2	Srgn
H2-Q1	Prr7	Epb41l2	Flna	Rpl26	Ccr8	H2-D1	Rps6	Isy1	Thy1
H2-Q4	Prrc2c	Ephx1	Flt3l	Rpl27	Ccser2	H2-K1	Rps7	Itgav	Tm6sf1
H2-Q6	Psme1	Esf1	Fosl2	Rpl27a	Cct4	H2-Q6	Rps8	Kdm2b	Tmem258
H2-Q7	Rab3ip	Etfa	Fth1	Rpl28	Cd160	H2afz	Rpsa	Kdm6b	Tmem50a
H2-T22	Rack1	Etv6	Ftl1	Rpl3	Cd200	Havcr2	Rtp4	Keap1	Tmsb10
H2-T23	Rbm3	Evl	Fxyd5	Rpl30	Cd226	Higd1a	Sesn3	Klrc2	Tmsb4x
Havcr2	Rnf157	Fam107b	Gabrr1	Rpl31	Cd247	Hilpda	Set	Kmt2e	Tomm7
Hcls1	Rpl10	Fam129a	Gatad2a	Rpl32	Cd27	Hpcal1	Sla	Lck	Tpt1
Hist1h1c	Rpl10a	Fam162a	Gbp10	Rpl34	Cd28	Hsp90b1	Slc38a2	Lin54	Trav12-3
Hivep3	Rpl11	Fam168a	Gbp4	Rpl35	Cd3d	Icos	Smad7	Litaf	Trav13-4-dv7
Hopx	Rpl12	Fam53b	Gbp6	Rpl35a	Cd3e	Id2	Snhg1	Lmnb1	Trav13d-4
Hsd11b1	Rpl13	Farsb	Gbp8	Rpl36	Cd44	Ifitm1	Snrpg	Luzp1	Trav16d-dv11
Icos	Rpl13a	Fas	Gbp9	Rpl36a	Cd47	Ifitm2	Sntb1	Ly6k	Trav3-3
Id2	Rpl14	Fbl	Gem	Rpl36al	Cd53	Igfbp7	Socs1	Ly75	Trav6-1
Ier3	Rpl15	Fbxo11	Gimap3	Rpl37	Cd80	Il12rb2	Srsf7	Madd	Trbc2
Ifi27	Rpl17	Fcf1	Gimap4	Rpl37a	Cd82	Il1r2	Tagap	Man2a1	Trbv1
Ifi27l2a	Rpl18	Fgf13	Gimap7	Rpl38	Cd83	Il2rb	Tcrg-C1	Map2k3	Trbv13-1
Igtp	Rpl18a	Fhl2	Gipc2	Rpl39	Cd8a	Il7r	Tmsb10	2023-03-07	Trbv19
Ikzf1	Rpl19	Flnb	Gldc	Rpl41	Cdc42	Impa2	Tox	Maz	Trbv2
Il12rb2	Rpl21	Fnbp1	Glrx	Rpl6	Cdc42se1	Irf8	Trac	Mgst2	Trbv29
Il27ra	Rpl22	Fndc3a	Gm11808	Rpl7a	Cdca4	Isy1	Trav7-4	Mif4gd	Trbv30
Il2rg	Rpl22l1	Fos	Gm156	Rpl9	Cdkn1a	Itga3	Trbv14	Mknk2	Txnip
Iqgap1	Rpl23	Fosb	Gm17018	Rplp0	Cdv3	Itgal	Ubald2	Mnd1	Uba52
Irf8	Rpl23a	Foxp1	Gm29243	Rplp1	Celf2	Itgb2	Ube2d3	Mxi1	Ugcg
Itga1	Rpl24	Foxp4	Gm30054	Rplp2	Cenpa	Itgb3	Vps37b	Myo10	Upp1
Itgal	Rpl26	Furin	Gm7030	Rps10	Cenpb	Itm2c	Xcl1	Nab1	Uqcrb
Itgav	Rpl27	Fyn	Gmfg	Rps11	Cep350	Jdp2	Xist	Nabp1	Zeb2
Itgb2	Rpl27a	Gabarapl1	Gnai2	Rps12	Cers2	Kif2a	Zfp36l1	Naca	Zfp182
Itk	Rpl28	Gadd45b	Gnb1	Rps13	Cers5	Kit	Zfp36l2	Ncf4	Zfp36l1
Itm2b	Rpl29	Gar1	Gng10	Rps14	Cfap77	Klrd1		Ndrg1
Itm2c	Rpl3	Gata3	Gng2	Rps15	Cflar	Krtcap2		Nefh
Jpt1	Rpl30	Gch1	Gnptab	Rps15a	Chd4	Lag3		Nfatc1
Junb	Rpl32	Gdi2	Golga7	Rps16	Chic2	Lair1		Nfkb2
Jund	Rpl35	Gfod1	Gpd2	Rps19	Chmp1b	Laptm5		Nfkbie
Kdm5b	Rpl35a	Glud1	Gpi1	Rps20	Chmp4b	Ldha		Npc2
Kdm7a	Rpl36	Gm15283	Gpsm3	Rps21	Chp1	Lgals1		Npm1
Klrc1	Rpl36a	Gm19585	Gpx4	Rps23	Chst11	Lgals3		Nr4a2
Klrc2	Rpl36al	Gm20400	Grb7	Rps24	Chtop	Lipa		Nsd3
Klrd1	Rpl37	Gm26740	Grina	Rps26	Ciapin1	Lpcat4		Nudt4
Klrk1	Rpl37a	Gm2682	Gstp1	Rps27	Cib2	Lrrk1		Nup98
Kmt2e	Rpl38	Gm2a	Gstp3	Rps27a	Cish	Ly6g5b		Ocel1
Lactb	Rpl39	Gm31718	Gxylt1	Rps28	Clasp2	Ly75		Ociad1
Lag3	Rpl4	Gm43042	Gzmd	Rps29	Clcf1	Man2b1		Osbpl3
Lamc1	Rpl41	Gm49180	Gzme	Rps3	Clcn5	Map3k1		Osbpl9
Laptm5	Rpl5	Gm8369	Gzmf	Rps3a1	Cldnd1	Mapkapk3		P2ry10
Lat	Rpl6	Gna13	Gzmk	Rps4x	Clip1	Mbd2		Pabpc1
Leprotl1	Rpl7	Gpm6b	H2-D1	Rps5	Clptm1l	Mdh1		Panx1
Lfng	Rpl7a	Gpr18	H2-T22	Rps6	Cmip	Mid2		Pcyt1a
Lgals3	Rpl8	Gpr65	H3f3b	Rps7	Cmtm7	Mink1		Pdcd1
Ly6a	Rpl9	Gpr68	Hacd3	Rps8	Cnbp	Mlf2		Pde4d
Ly6c1	Rplp0	Gramd1b	Hcst	Rps9	Cnih1	Mt1		Perp
Ly6c2	Rplp1	Grap	Hilpda	Rpsa	Cnih2	Mt3		Pkp3
Lyst	Rplp2	Grasp	Hist1h1e	Rtp4	Cnih4	Myl12a		Pkp4
Mbnl1	Rps10	Gtpbp4	Hmgb1	S100a6	Copb1	Myl12b		Plek
Mdfic	Rps11	Gypc	Hmgb2	Sec61b	Copg1	Myl6		Plekha2
Mdh1	Rps12	Gzma	Hnrnpl	Sec61g	Copz1	Myo10		Plxnc1
Mlec	Rps13	H2-Oa	Hsbp1	Serpina3f	Coro7	Nabp1		Pon2
Mlf2	Rps14	H3f3a	Hsp90b1	Serpina3g	Cox6a1	Ncor2		Ppp1cc
Ms4a4a	Rps15	Hdlbp	Icos	Sh2d1a	Cpd	Ndufa11		Ppp1r16b
Ms4a4b	Rps15a	Heg1	Id2	Skap1	Cpsf2	Ndufb7		Prkca
Ms4a4c	Rps16	Herpud1	Ier5l	Slc38a2	Cpt1a	Nebl		Prkce
Ms4a6b	Rps17	Hif1a	Ifitm10	Snhg8	Creb3l2	Nedd9		Prkch
Ms4a6d	Rps18	Hivep2	Ifngr1	Snrpe	Crebbp	Neurl3		Prr7
Msn	Rps19	Hmgn1	Igf2r	Snrpf	Crem	Nkg7		Ptbp1
Myl6	Rps2	Hnrnpa0	Ikzf2	Snrpg	Crip1	Nmrk1		Pten
Ndfip1	Rps20	Hnrnpab	Ikzf3	Socs1	Crlf2	Npnt		Ptp4a2
Nkg7	Rps21	Hsf2	Il10ra	Son	Crtam	Nrgn		Ptpn22
Nrgn	Rps23	Hsp90ab1	Il2rb	Sp110	Cry1	Nucb1		Rab8b
Nucb1	Rps24	Hspa8	Il3ra	Tmsb10	Csde1	Oip5os1		Rac1
Orai1	Rps25	Hspa9	Impa2	Tomm7	Csf1	Orai1		Rack1
Ost4	Rps26	Hspd1	Impact	Tox	Csnk1a1	Os9		Rassf1
Paip2	Rps27	Ier5	Irak2	Trav12-3	Csnk1d	Ostf1		Rbl2
Pde3b	Rps27a	Iffo2	Irf8	Trav13-4-dv7	Csnk2a2	Parp8		Rbm3
Peli1	Rps28	Ifitm1	Isg20	Trav13d-4	Csnk2b	Pdcd1		Rbpj
Pfn1	Rps29	Ifitm2	Isy1	Trav3-3	Csrnp1	Pdia3		Rgs16
Pkm	Rps3	Ifnar2	Itgav	Trbc1	Cst3	Pdia6		Rgs2
Pld3	Rps3a1	Il18r1	Itih5	Trbv1	Ctbp1	Penk		Rhog
Plec	Rps4x	Il18rap	Itm2b	Trbv19	Ctdnep1	Pgk1		Rngtt
Pmepa1	Rps5	Il2ra	Itpk1	Trbv29	Ctsb	Pglyrp1		Rora
Pold4	Rps6	Il2rg	Jdp2	Trbv30	Ctsd	Phlpp1		Rpl10a
Pou2f2	Rps7	Il7r	Keap1	Trgv2	Ctu2	Pkm		Rpl12
Ppp1r18	Rps8	Imp3	Klrd1	Trmt112	Cuedc2	Plaat3		Rpl3
Prf1	Rps9	Impdh2	Klre1	Uba52	Cwc27	Plac8		Rpl4
Prr13	Rpsa	Inpp4b	Lamtor4	Ugcg	Cxcr6	Plcl1		Rpl5
Psmb8	Rrad	Ipo5	Laptm4a	Uqcrh	Cyth4	Pld3		Rpl7a
Psmb9	Runx3	Iqgap2	Laptm5	Vps37b	Cytip	Plp2		Rplp0
Ptms	Sec61b	Irf2bp2	Lat2	Xaf1	D16Ertd472e	Plxdc2		Rps18
Ptp4a3	2023-09-06	Irf4	Lck	Zfas1	Dad1	Ppib		Rps2
Ptpn18	Sft2d2	Itga6	Lgals1	Zfp36l2	Dap	Ppp1cc		Rps3
Ptprc	Sh3bgrl	Itgb1	Lgals3bp	Zfp652	Dbi	Ppp1r3b		Rps5
Rac1	Siva1	Itgb7	Lilr4b	mt-Nd4l	Dcaf7	Ppt2		Rps6
Rac2	Slc16a11	Itpkb	Lilrb4a		Ddb1	Pqlc3		Rpsa
Ramp1	Slc22a15	Itpr1	Litaf		Ddt	Prdx5		Runx3
Rap1b	Slc39a6	Jak2	Lpxn		Ddx1	Prelid1		Sbno1
Rasa1	Smco4	Jaml	Lrrk1		Ddx5	Prf1		Setbp1
Rassf5	Smpdl3b	Jarid2	Lsp1		Degs1	Prr13		Sf3b1
Rbpj	Sms	Jmjd1c	Ltb		Dennd5a	Prxl2a		Sft2d2
Reep5	Smyd2	Kcnn4	Ly6a		Dgat1	Psmb1		Sh2d2a
Rgs1	Snhg1	Kdm6b	Ly6c1		Dgka	Psmb8		Sik3
Rgs16	Snhg12	Kit	Ly6c2		Dgkz	Ptms		Siva1
Rheb	Snrpd1	Larp4	Lyst		Dhx40	Pxdc1		Sla2
Rhof	Snrpd3	Lcp1	Lzts1		Diaph1	Rab4a		Slain1
Rnasek	Snrpf	Lcp2	Map1lc3b		Dnajb4	Rac1		Slc22a15
Runx1	Snrpg	Ldlrad4	Mat2b		Dnajb9	Rac2		Slc25a19
Runx2	Sntb1	Lfng	Mctp2		Dnajc1	Rad54l2		Slc25a3
S100a6	Snx3	Lmna	Med10		Dnajc10	Ramp3		Slc3a2
Samsn1	Snx5	Lrch1	Mien1		Dnajc13	Rap2a		Slc9a3r1
Sat1	Sorl1	Lrig1	Mndal		Dnajc15	Raph1		Slk
Satb1	Srsf3	Lrrc8d	Mob4		Dnmt3a	Rbl2		Smad7
Sdcbp2	Ssbp1	Lta	Mrpl33		Dot1l	Rcn1		Smarca5
Sdf4	Stn1	Maml2	Ms4a4b		Dpf2	Reep5		Smchd1
2023-09-01	Taf1d	Map3k8	Ms4a6b		Dr1	Rgs1		Smco4
2023-09-09	Tctex1d2	Map4k4	Ms4a6d		Dscam	Rhoc		Smpdl3b
Serf2	Tent5a	Mapk14	Mt1		Dubr	Rhof		Sntb1
Serinc3	Tgfbr2	Mbp	Mt2		Dusp10	Rhog		Snx5
Serpinb6b	Thap12	Mdfic	Mt3		Dusp4	Rhoq		Snx9
Serpinb9	Tiprl	Mdn1	Mta3		Dusp5	Rnasek		Sqstm1
Serpine2	Tmem173	Mgat5	Mxd1		Dusp6	Rnf5		Srcap
Sh3bgrl3	Tmpo	Mif	Mxi1		E130308A19Rik	Rora		Srsf7
Shisa5	Tmprss6	Mir155hg	Myl12a		E430024P14Rik	Runx2		Stat3
Sla	Tmsb10	Mllt3	Myl12b		Eaf1	Runx3		Stk24
Slamf1	Tnfaip8	Mpc1	Myl6		Ece1	S100a10		Sult2b1
Slc17a6	Tnfrsf18	Mpzl3	Myo10		Edem1	S100a11		Tapbpl
Slc2a3	Tnfrsf4	Mrps6	Myo1f		Eea1	S100a13		Tcrg-C1
Slc37a2	Tnip1	Ms4a4c	Nab1		Eef2	S100a4		Tcrg-V6
Smox	Tomm70a	Msi2	Nabp1		Egln1	S100a6		Tctex1d2
Snx9	Tox	Myb	Napsa		Ehd1	S1pr4		Tgfbr2
Spcs3	Trbv14	Myc	Ncor2		Ei24	Sat1		Thap12
Spn	Trgv2	Myo9a	Ndfip2		Eif3a	Scn1b		Themis
Spp1	Tspan13	Nars	Ndufa1		Eif3b	Sdcbp2		Tigit
Srgn	Uap1	Nasp	Ndufa13		Eif3d	Sdf4		Tinf2
Srp14	Ubac2	Nck2	Ndufv3		Eif3g	Sec11c		Tiprl
Stat1	Ubxn4	Ncl	Nedd9		Eif3h	Selplg		Tkt
Stk17b	Uck2	Ncoa3	Nfil3		Eif3l	Sema4c		Tmem123
Sub1	Uhrf2	Ndfip1	Nkg7		Eif4a1	Sema7a		Tmem50b
Sytl2	Utf1	Ndufa4	Npc2		Eif4e	2023-09-09		Tmprss6
Tax1bp1	Ybx3	Nek7	Nr3c1		Eif4g3	Serf2		Tnfrsf1b
Tbc1d10b	Zeb1	Nfat5	Nr4a2		Eif6	Serinc3		Tnfrsf9
Tes	Zfas1	Nfatc3	Ntan1		Elavl1	Serpinb6a		Tox
Tgfb1	mt-Co3	Nfkb1	Nucb1		Elf4	Serpinb6b		Tpm4
Tgoln1	mt-Nd4	Nfkb2	Nudt18		Ell2	Serpinb9		Tpst2
Thy1	mt-Nd4l	Nfkbia	Ociad2		Elmo1	Serpinb9b		Traf3
Tigit		Nfkbib	Osgin1		Elmo2	Serpine2		Traf4
Tle5		Nfkbid	Oxct1		Elp5	Sh3bgrl3		Trav6-3
Tln1		Nfkbiz	Padi2		Emb	Slc25a3		Trav7-4
Tm6sf1		Nme2	Pdcd1		Emc10	Slc37a2		Trbj2-6
Tm9sf3		Nolc1	Pfdn5		Emc7	Slc39a14		Trbv12-2
Tma7		Nop10	Pfn1		Emp1	Slco3a1		Trbv14
Tmem134		Nop16	Pglyrp1		Emp3	Smap2		Trerf1
Tmem171		Nop58	Pitpnc1		Emsy	Smim3		Trnt1
Tmem30a		Npm1	Plaat3		Endod1	Smox		Txn1
Tmem50a		Nptn	Plac8		Eno1	Smpd4		Ube2b
Tmsb4x		Nr4a1	Pld3		Epas1	Snx14		Ube2j1
Tnfaip3		Nrgn	Plekha2		Eps15	Snx20		Uhrf2
Tnip3		Nrip1	Plk3		Ercc1	Spcs3		Vasp
Tpm3		Nrn1	Ppm1j		Ercc6	Spin4		Vps37b
Tpt1		Nsun2	Ppp1r18		Ern1	Spint2		Wapl
Trac		Nt5c	Ppp1r3b		Erp44	Spn		Ybx3
Tram1		Nt5dc1	Prdm1		Ets1	Spp1		Ywhaz
Tspo		Ntrk3	Prdx5		Etv6	Sqstm1		Zbtb1
Ttc39c		Osbpl8	Prex1		Exph5	Sri		Zc3hav1
Txnip		P4ha1	Prf1		Extl3	Srp14		Zdhhc18
Ubb		P4hb	Prkch		Faim	Srxn1		Zeb1
Ubl5		Pa2g4	Prr13		Fam107b	Stat3
Ucp2		Pacsin1	Psmb10		Fam110a	Stk24
Upp1		Parp8	Psmb8		Fam120a	Sytl2
Vasp		Pcgf5	Psme1		Fam129a	Tbc1d9b
Vat1		Pdcd4	Pstpip1		Fam160b1	Tctex1d2
Vgll4		Pde4b	Ptpn18		Fam162a	Tent5a
Ywhaz		Pde7a	Ptpn22		Fam168a	Tff1
Zap70		Pdlim1	Ptprcap		Fam174a	Tgfb1
Zeb2		Pebp1	Pvrig		Fam89b	Thy1
Zyx		Phactr2	Rab19		Farsb	Tiam1
		Picalm	Rab29		Fbxo11	Tiprl
		Piezo1	Rac2		Fbxo32	Tle5
		Pik3r5	Rassf1		Fbxo33	Tm6sf1
		Pim1	Rbl2		Fcrl6	Tmem120b
		Plcxd2	Rbm3		Fhl2	Tmem123
		Plxdc2	Rexo5		Filip1	Tmem214
		Pmepa1	Rgs1		Filip1l	Tmem30a
		Pno1	Rgs16		Fkbp1a	Tmem50a
		Pou2f2	Rgs2		Flnb	Tmem71
		Ppan	Rhoq		Flot2	Tmsb4x
		Ppp1cb	Riok1		Fmnl1	Tnfrsf18
		Prelid2	Rmnd5b		Fndc3a	Tnfrsf4
		Prrc2c	Rnf130		Fosb	Tnfrsf9
		Psmd11	Rpa2		Foxj2	Tpm4
		Psmd12	Rpl11		Foxn3	Tprgl
		Psmd7	Rpl13a		Foxp1	Tpt1
		Psmd8	Rpl17		Furin	Traf4
		Ptges3	Rpl18a		Fyn	Tram1
		Ptpn11	Rpl27		G3bp2	Trappc6b
		Ptpn13	Rpl30		Gabarapl1	Trav5-1
		Ptpn6	Rpl32		Gabarapl2	Trav6-1
		Ptprk	Rpl36		Gabpb1	Trbc2
		Ptprs	Rpl37		Gabrr1	Trbv2
		Rab11fip1	Rpl37a		Gadd45b	Tstd3
		Rab37	Rpl38		Galnt1	Ttc39c
		Raet1e	Rpl39		Galnt18	Tubb6
		Raf1	Rps11		Galnt3	Tusc3
		Rala	Rps13		Gapdh	Ubl5
		Ran	Rps15a		Gatad2a	Ucp2
		Rasgef1b	Rps21		Gch1	Ugt1a7c
		Rassf3	Rps23		Gdi2	Unc119
		Rassf5	Rps9		Gem	Upp1
		Rbm25	Rundc3b		Gemin7	Vamp8
		Rcl1	Runx3		Ghitm	Wdr1
		Reep3	S100a11		Gipc2	Wls
		Rel	S100a13		Gldc	Ybx3
		Relb	S100a4		Glg1	Ywhah
		Rexo2	S100a6		Glipr1	Zbtb42
		Rftn1	Samsn1		Gltp	Zcchc14
		Rgcc	Sdcbp2		Glud1	Zyx
		Rgs10	Sdhb		Gm13571
		Rilpl2	Sec11c		Gm20400
		Ripor2	Selenok		Gm2a
		Rnf138	Selenow		Gm36723
		Rnf157	Selplg		Gm4022
		Rnf19a	Sema4a		Gm47015
		Rnf40	Serf2		Gm8909
		Rora	Serinc3		Gmppb
		Rpl15	Serpina3g		Gna15
		Rpl29	Serpinb6a		Gnai2
		Rpl35	Serpinb9		Gnai3
		Rpl35a	Serpinb9b		Gnaq
		Rpl7	Setbp1		Gnb1
		Rpl8	Sh2d2a		Gnb4
		Rps12	Sh3bgrl3		Gnb5
		Rps15	Sh3glb1		Golga4
		Rps17	Shisa5		Golph3
		Rps18	Siva1		Golt1b
		Rps19	Sla2		Gorasp2
		Rps2	Slc37a2		Gosr2
		Rps25	Slc3a2		Got1
		Rps8	Smap2		Gpbp1
		Rpsa	Smc6		Gpm6b
		Runx1	Smpdl3b		Gpr132
		Runx2	Snx18		Gpr171
		Runx2os1	Sp100		Gpr65
		Ruvbl1	Spp1		Gpr68
		Samd3	Srp14		Grb2
		Satb1	Ssbp1		Grcc10
		Scpep1	Stard3nl		Grpel1
		Scyl2	Stat1		Gstm5
		Sdf4	Stk24		Gtdc1
		Sec61a1	Styk1		Gtpbp4
		Sectm1a	Sub1		Gzmb
		Sema6d	Sytl2		Gzmc
		Serbp1	Tapbpl		Gzmd
		Sesn3	Tceal9		Gzme
		Sfr1	Tcrg-C1		Gzmf
		Sgk1	Tex2		Gzmg
		Sgms1	Tgfbr2		H13
		Sh3bp5	Tigit		H2-D1
		Shmt2	Tinf2		H2-K1
		Sik3	Tiprl		H2-Q10
		Skp1a	Tle5		H2-Q4
		Sla	Tln1		H2-Q6
		Slamf6	Tm6sf1		H2-Q7
		Slamf7	Tmcc3		H2-T23
		Slc15a3	Tmem135		H2afz
		Slc17a6	Tmem163		H3f3a
		Slc1a5	Tmem189		Hadhb
		Slc4a7	Tmem33		Havcr2
		Slc6a6	Tmem50a		Hax1
		Slc7a1	Tmprss6		Hbp1
		Slco3a1	Tmsb10		Hccs
		Slco4a1	Tmsb4x		Hdac3
		Slfn2	Tpt1		Hdgf
		Snhg1	Trbc2		Hdlbp
		Snhg15	Trbv14		Hif1a
		Snrpd3	Trgv2		Hip1r
		Spry1	Tspo		Hipk2
		Srgn	Tstd3		Hivep1
		Srm	Txk		Hivep2
		Ssh2	Uba52		Hmces
		St3gal1	Ube2v1		Hnrnpab
		St6galnac3	Ubl5		Hnrnpk
		Stap1	Ugcg		Hnrnpl
		Stat4	Uhrf2		Hsd17b10
		Stat5a	Unc119		Hsd17b12
		Stat5b	Upp1		Hsf2
		Stim2	Uqcrh		Hspa13
		Stk10	Vamp8		Huwe1
		Stk4	Vopp1		Icos
		Stx11	Vps28		Id2
		Stx6	Vps37b		Ier3
		Supt3	Wdr95		Ifitm1
		Synj2	Wls		Ifitm2
		Sytl3	Ypel3		Ikzf1
		Tagap	Zbp1		Il12rb2
		Tagln2	Zcchc14		Il18rap
		Tbc1d10a	Zdhhc18		Il1r2
		Tbc1d4	Zgpat		Il21r
		Tbl1x	Zyg11b		Il2ra
		Tbl1xr1	Zyx		Il2rb
		Tcf12			Il2rg
		Tcf7			Il7r
		Tcp1			Impa2
		Tdg			Insyn2b
		Tespa1			Iqgap1
		Tfrc			Irf8
		Tg			Isy1
		Thada			Itfg1
		Tiam1			Itga3
		Timp2			Itgal
		Tle3			Itgav
		Tlk1			Itgb2
		Tmbim1			Itgb3
		Tmed10			Itm2b
		Tmem65			Itm2c
		Tnf			Itpr1
		Tnfaip8			Itpripl1
		Tnfaip8l2			Jade2
		Tnfsf11			Jak2
		Tnfsf14			Jak3
		Tnfsf4			Jazf1
		Tnfsf8			Jdp2
		Tnip1			Jmjd1c
		Tnip3			Jpt1
		Tob1			Jund
		Tob2			Kansl3
		Tomm40			Kcnn4
		Traf1			Kdelr2
		Tulp4			Kdm2b
		Uap1			Kdm3a
		Ubac2			Kdm5b
		Ubald2			Kdm6b
		Ube2d2a			Khnyn
		Ubl3			Kif15
		Ubr2			Kif2a
		Ubr5			Kif5b
		Uhrf1bp1l			Kit
		Utf1			Klf13
		Utp18			Klf16
		Utrn			Klk8
		Vapa			Klrc1
		Vgll4			Klrc2
		Wdr36			Klrc3
		Wipf1			Klri2
		Xcl1			Kmt2e
		Ybx1			Lactb
		Zc3h12d			Lag3
		Zdhhc13			Lair1
		Zeb2			Lamc1
		Zfp36l1			Laptm5
		Zfp62			Larp1b
		mt-Co1			Larp4
		mt-Co3			Larp4b
		mt-Cytb			Lat
		mt-Nd2			Lcp1
		mt-Nd4			Lcp2
		mt-Nd5			Lfng
					Lgals1
					Lgals3
					Lipa
					Lman2
					Lmna
					Lnx2
					Lpcat4
					Lpgat1
					Lrch1
					Lrrc8d
					Lrrfip2
					Lrrk1
					Luc7l
					Ly75
					Lzic
					M6pr
					Madd
					Maea
					Man1a2
					Man2a1
					Man2b1
					Map2k1
					Map2k3
					Map3k1
					Map4
					Map4k4
					Mapk1
					Mapk14
					Mapkapk3
					Mapre1
					2023-03-02
					2023-03-07
					Max
					Mbd2
					Mbnl1
					Mbp
					Mbtd1
					Mcl1
					Mcu
					Mcur1
					Mdfic
					Mdh1
					Med13
					Metap1
					Mgat1
					Mgat5
					Mib1
					Mid2
					Mif4gd
					Mir155hg
					Mlec
					Mlf2
					Mllt3
					Mocs2
					Morf4l2
					Mpc1
					Mrpl34
					Mrps6
					Ms4a4a
					Ms4a4b
					Ms4a4c
					Msi2
					Msn
					Msrb1
					Mtmr1
					Mtmr14
					Mvp
					Mxd4
					Myb
					Myl12a
					Myl12b
					Myl6
					Myo10
					Myo9a
					Nabp1
					Nacc1
					Ncald
					Ncf4
					Ncoa2
					Ndfip1
					Ndrg1
					Ndufv2
					Nebl
					Nedd9
					Nek7
					Nelfa
					Nfat5
					Nfkb1
					Nfkb2
					Nfkbib
					Nfkbie
					Nlk
					Nmrk1
					Nploc4
					Nptn
					Nr1h2
					Nr4a3
					Nrbf2
					Nrgn
					Nrip1
					Nsmf
					Nt5c
					Nucb1
					Nup98
					Nvl
					Oaz1
					Oip5os1
					Orai1
					Orai3
					Osbp
					Osbpl3
					Osbpl8
					Ostc
					Ostf1
					Otud4
					P4hb
					Pabpc1
					Pabpn1
					Paf1
					Pafah1b2
					Paics
					Paip2
					Parp8
					Paxbp1
					Pbrm1
					Pcf11
					Pcgf5
					Pcnx
					Pcyt1a
					Pdcd1
					Pdcl3
					Pde4d
					Pde4dip
					Pdia3
					Pdia6
					Penk
					Perp
					Pfkl
					Pgam1
					Pgk1
					Phactr2
					Phf20l1
					Phf23
					Phlpp1
					Pi4k2b
					Picalm
					Pik3r1
					Pim1
					Pin1
					Pip5k1a
					Pithd1
					Pitpna
					Pkm
					Pkp3
					Pkp4
					Plagl2
					Plcl1
					Plcl2
					Plcxd2
					Pld3
					Plec
					Plek
					Plekhb2
					Plxdc2
					Plxnc1
					Pnkd
					Pold4
					Pon2
					Pou2f1
					Pou2f2
					Ppib
					Ppm1a
					Ppp1cb
					Ppp1cc
					Ppp1r11
					Ppp1r15a
					Ppp1r18
					Ppp2ca
					Ppp2cb
					Ppp2r1a
					Ppp2r1b
					Ppt2
					Prdx2
					Prelid1
					Prelid2
					Prf1
					Prkar1a
					Prkca
					Prkce
					Prkcsh
					Prr13
					Prxl2a
					Psma5
					Psmc2
					Psmc5
					Psmd11
					Psmd8
					Ptbp1
					Ptch1
					Ptms
					Ptp4a2
					Ptpn11
					Ptprk
					Ptprs
					Rab10
					Rab11a
					Rab11fip1
					Rab1b
					Rab21
					Rab4a
					Rab5a
					Rab8b
					Rabac1
					Rabgap1l
					Rabgef1
					Rac1
					Rac2
					Rad54l2
					Raf1
					Ralbp1
					Ralgapb
					Ralgds
					Raly
					Ramp3
					Rap1b
					Rap1gds1
					Rap2a
					Rapgef1
					Raph1
					Rara
					Rassf3
					Rassf5
					Rbl2
					Rbpj
					Rce1
					Rcl1
					Rcn1
					Reep3
					Reep5
					Rel
					Rela
					Relb
					Rest
					Rftn1
					Rgs1
					Rgs16
					Rhbdf2
					Rhof
					Rhog
					Ric8a
					Rilpl2
					Rnasek
					Rnf10
					Rnf125
					Rnf146
					Rnf19a
					Rnf40
					Rnf5
					Rnh1
					Rnpep
					Rora
					Rpl10-ps3
					Rpn1
					Rpn2
					Rps18
					Rrp1
					Rtn3
					Rtn4
					Runx1
					Runx2
					Runx2os1
					S100a4
					S1pr4
					Sae1
					Samd4b
					Sap30l
					Sat1
					Satb1
					Scamp2
					Scarb2
					Scn1b
					Scp2
					Scyl2
					Sdcbp
					Sdcbp2
					Sdf2
					Sdf4
					Sec14l1
					Sec22b
					Sec23b
					Sec61a1
					Selenos
					Sema4c
					Sema4d
					Sema7a
					2023-09-11
					2023-09-07
					2023-09-09
					Serinc1
					Serinc3
					Serpinb6a
					Serpinb6b
					Serpinb9
					Serpine2
					Sft2d2
					Sgpl1
					Sh3rf1
					Sik3
					Sirt2
					Sla
					Slamf1
					Slc15a3
					Slc17a6
					Slc25a17
					Slc25a3
					Slc25a51
					Slc29a1
					Slc2a3
					Slc30a9
					Slc35a2
					Slc37a2
					Slc48a1
					Slc6a6
					Slc7a1
					Slc9a3r1
					Slco3a1
					Slco4a1
					Slfn2
					Smap2
					Smarca4
					Smarca5
					Smc3
					Smim3
					Smox
					Smpd4
					Snrk
					Snx13
					Snx14
					Snx17
					Snx20
					Snx9
					Socs5
					Spata13
					Spcs3
					Specc1l
					Spn
					Spp1
					Spsb3
					Sptlc2
					Sqstm1
					Srgn
					Sri
					Srp14
					Srprb
					Srxn1
					Ss18
					Ssbp3
					St3gal4
					St6galnac3
					Stag2
					Stap1
					Stard7
					Stat3
					Stat4
					Stat5a
					Stat5b
					Stat6
					Stim1
					Stk10
					Stk24
					Stk25
					Stk26
					Stk4
					Strip1
					Stt3a
					Stx11
					Stx6
					Sub1
					Sugt1
					Sumo2
					Supt6
					Surf4
					Synj2
					Sytl3
					Tagap
					Tagln2
					Taok1
					Tap2
					Tax1bp1
					Tbc1d10b
					Tbc1d9b
					Tbl1x
					Tbl1xr1
					Tcf12
					Tcrg-C1
					Tcrg-V6
					Tctex1d2
					Tdg
					Tent5a
					Tes
					Tet3
					Tfe3
					Tfg
					Tg
					Tgfb1
					Thap11
					Thap12
					Themis
					Thy1
					Tiam1
					Tigit
					Timm17b
					Tiprl
					Tle3
					Tm2d3
					Tm9sf3
					Tmbim1
					Tmbim6
					Tmed10
					Tmed9
					Tmem109
					Tmem115
					Tmem120b
					Tmem123
					Tmem127
					Tmem165
					Tmem171
					Tmem214
					Tmem30a
					Tmem43
					Tmem50a
					Tmem65
					Tmem70
					Tmem71
					Tmf1
					Tmsb4x
					Tmub2
					Tmx1
					Tmx3
					Tnfaip8
					Tnfrsf1b
					Tnfrsf4
					Tnfrsf9
					Tnfsf11
					Tnfsf4
					Tnip1
					Tnip3
					Tpi1
					Tpm3
					Tpm4
					Tprgl
					Tpt1
					Trabd
					Traf1
					Traf4
					Traf5
					Tram1
					Trappc6b
					Trav6-1
					Trav6-3
					Trav7-4
					Trbj2-6
					Trbv12-2
					Trbv14
					Triobp
					Trir
					Trpc4ap
					Trps1
					Tspan31
					Ttc39c
					Tubb6
					Tulp4
					Tusc3
					Txn1
					Txndc17
					Uap1
					Uba1
					Uba5
					Ubap1
					Ube2b
					Ube2d2a
					Ube2g1
					Ube2j1
					Ube2m
					Ubl3
					Ubl7
					Ubr3
					Ubr4
					Ubr5
					Ubxn6
					Ubxn7
					Ucp2
					Uhmk1
					Uhrf1bp1l
					Uhrf2
					Unc119
					Unc119b
					Unc50
					Upp1
					Usp48
					Usp8
					Utrn
					Vamp8
					Vasp
					Vat1
					Vcp
					Vgll4
					Vps54
					Vsir
					Wac
					Wapl
					Wbp2
					Wdfy1
					Wdr26
					Wipf1
					Wipi2
					Wnk1
					Wsb2
					Xbp1
					Xcl1
					Ybx1
					Ybx3
					Yipf3
					Ywhah
					Ywhaz
					Yy1
					Zap70
					Zbtb32
					Zbtb42
					Zbtb7a
					Zeb2
					Zfand3
					Zfp281
					Zfp52
					Zfp871
					Zmiz1
					Zyx
