# Supplementary material for: Low avidity T cells drive endogenous tumor immunity in mice and humans
Source: Research Square preprint supplement (doi:10.21203/rs.3.rs-3903457/v1), 2024-04-04
Supplement: Supplementary file 2 [file cf4dca8b591f6d9d42e25e1f.xlsx]

## Sheet: Sheet1
KM_1		KM_2
Upregulated	Downregulated	Upregulated	Downregulated
Trbv1	Zdhhc1	Trbv14	Gimap5
Trav13d-4	Pafah1b1	Trav7-4	1500015A07Rik
Rpl38	Txndc11	Trav6-3	Gucy1b1
Rpl39	Phactr2	Tcrg-C1	H2-Q1
Rpl37	Ddi2	Trbv13-2	Gimap7
Rps29	Actr3	Tcrg-V6	Morn3
Rps28	Arhgef10	Trav6-1	Pcolce
Rpl41	Zfp790	Trbv12-2	Baiap2l1
Rpl37a	Dyrk2	Creb3l2	Srgn
Rps21	4930578N18Rik	Trbv2	Capg
Plac8	Pik3ca	Trav5-1	Tpsab1
Rpl35	Cacna1a	Trbv13-1	Actr1b
Rps27	Rnf13	Trbj2-6	Adgrb2
Trbc1	Kif2a	Gldc	App
Trav13-4-dv7	Rnf8	H2-Q6	Atp13a4
Rpl36	Fcrla	Rora	Gmnn
Trav3-3	Ksr1	Eef2	Cmc1
Rpl35a	Axin1	H2-Q4	Fam78b
Trbv29	Chpf	Gm20400	Emilin2
Rpl36a	Gimap8	Cd247	Ttk
Tmsb10	Gm20406	Ly6k	Gramd4
Rpl34	Nfs1	Klrc2	Cenpv
Cox7c	Dnaaf2	Stat3	Isg20
Rps26	Nedd1	Pdcd1	Pfdn1
Trbv5	H2-Q2	Gm8909	Slirp
Trav4-3	Cdk6	Trbv13-3	Glb1
Spp1	Gm49086	Ybx3	Ugt1a7c
Trbv31	Rab12	Uhrf2	Xlr3b
S100a6	Scamp2	Ets1	Ret
Sec61g	Cyc1	Slc25a3	Nop10
Rplp2	Zfp647	Rps18	Rpl14
Atp5e	Inpp4a	Sdcbp2	Naip2
Atp5mpl	Zpr1	Rgs16	Arnt2
Trbj2-1	Nfatc2	Cblb	Pik3r1
Tomm7	Bnip3l	Trgj1	Mypop
Snrpg	Trav6d-3	Prkar1a	Ikzf2
Fau	Wdr82	Stk24	Pin4
Trbv15	Zswim6	Tmem123	Zfp583
Atp5k	BC004004	Ehd1	Nkapd1
Trdv1	Gaa	Sqstm1	Sec11c
Atp5md	Myl12a	Crbn	Atf3
Rpl21	Fam160a2	Sult2b1	Cdc14b
Uba52	Trim11	mt-Atp6	BC024063
Bcl2	Utp3	Il2rb	Evi5
Zfp182	Msl2	Tiam1	Tbc1d32
Ly6c2	Gm16286	Eif3h	Trav16
Trbv19	Lclat1	Atxn1	Rps27l
Rpl30	Stk26	Hspa8	Gm13822
Ndufa3	Sidt2	Kdm6b	Gm36738
Trav12-3	Lztr1	Sh2d2a	Cetn3
Cox17	Rab5if	Prss2	Ubl5
E330020D12Rik	Peak1	Jak2	Gm11998
Trav7-1	Ascl4	Ppp1cc	Dst
Bola2	Stx11	Eef1a1	Selenon
Trav9-4	Cd300ld	Tpm4	Zbtb40
Mrpl52	Gnpda2	Cd27	Rps16
Cox6c	Tmc8	Runx2	Gspt2
Trav10	Krr1	Atp9a	Arhgef16
Fgl2	Clec16a	Serpinb6a	Gstp1
Rpl22	Zfp414	Dazap2	Mylk
Gm42418	Cpeb2	Plxnc1	Ube2e2
Cd52	Smchd1	Tnfrsf4	Anapc13
Gm11808	Usp12	Selplg	Tra2b
Ndufb1-ps	Wdr45	Lrch1	A530040E14Rik
Elob	Spata2	Il21r	Aldh2
Neurl3	Coro7	Cmtm7	Ppp1r3b
Rpl23	Stxbp2	Nfkb2	Hemk1
Rps24	Fbxo5	Glud1	Cenpw
Klre1	Gng2	Sytl3	Nrarp
Trbv16	Naa16	Cd200	Jaml
Trbv3	Rnh1	Ucp2	Hist1h4d
Trav6-7-dv9	Gm16573	Myo10	Swap70
Gm2682	Rnf31	Galnt18	Rpl10
Sp140	Arrb2	Trav5-4	Slc14a1
Rbis	Capn11	Ciapin1	Dsp
Rps27a	Pbrm1	Gpbp1	Ticam2
Polr2l	Prdm5	Kdm2b	Rnaseh2c
Krtcap3	Gm28556	Peli1	Dnaja4
Trav13n-4	Ighv5-6	Trbj2-5	Klf7
Trav15-1-dv6-1	Whamm	Itgav	Bend6
H3f3b	Wdr48	Mif4gd	Slc16a11
Txk	Ginm1	Aebp2	Cela1
Mtus2	Vgll4	Cfap77	Wwtr1
Rpl6	Sos1	Traf4	Rgs8
Rps20	Dock7	Gpr160	Hist1h2bc
Ndufa1	Isoc2b	Fam110a	Pxdc1
Tspan13	Ttf1	Prickle2	A530032D15Rik
Hspe1-rs1	Grid2	Arf1	Mt2
Rps13	Cysltr2	Gpr68	Cox6a1
Trav4-4-dv10	Creb3	Cntln	Btbd11
5830405F06Rik	2610021A01Rik	Hnrnpl	Ly6c1
1700097N02Rik	Csnk1g2	Zdhhc18	Trgv2
Serf2	Inf2	Cmip	Lat2
Upp1	Arfgef1	H2-Q7	Myl6
Atp5j	Ppat	Foxo1	Pkd2
Atp5j2	Gm50063	Klrc3	Hilpda
Romo1	Taf12	Tap1	Glmn
Ndufa13	Csde1	Themis	Trav13-2
Trav10d	Dnase1l1	Cd44	Mrpl33
Gm10260	Gm15956	Trav1	Klrd1
Trav8d-2	Rin3	Cd82	Sh3bgrl3
Serpinb9b	Klhl2	Ighm	Llph
Rps8	Cand1	Ly75	Dnajc19
Rpl31	Zfp451	Lck	Trmt112
Sp110	Ube4bos1	Man2a1	Eps8
2900026A02Rik	Rsrc2	Rbl2	Eya2
Son	Fkrp	Gzmf	Eomes
Uqcrb	Gfod1	Map2k3	Rps25
Mdh2	Zfand3	Tapbpl	Spry2
Cops9	Gatad1	Ramp3	Pfdn2
Dpm3	Pum1	Ptbp1	Ddx18
Ndufa5	2010016I18Rik	Cnbp	Snhg8
Ramp1	Slc35a2	Atp10a	Samd3
Ptma	Dvl2	Il18r1	Gm43042
Tmem258	Nktr	Sdf4	Rpl24
Rps15a	Adprm	Gabpb1	Bloc1s1
Sem1	Uso1	Gm11361	Fcer1g
Rplp1	Foxp4	Trav17	Rps7
Uqcr11	Pura	Map3k1	Arpp19
H1fx	Nsmf	Sf3b1	Vmn2r96
Cst7	Rnf146	H13	Rps12
Cox20	Eps15	Lin54	Atox1
Hcst	Lmf2	Zeb1	Pglyrp1
Dpp4	Tbc1d9b	Icam1	Ndufa2
Rpl22l1	Mob1b	Ece1	Snhg3
Filip1	Tubb4b	Penk	Susd1
Tmem223	Mbtd1	Akna	Ly6e
Ptp4a3	Mov10	Stat4	Tpm1
Cd55	Ilkap	Nr4a3	Rpl27
Pet100	Nus1	Tap2	AI413582
Rpl26	Zc3h15	Mnd1	Rnaset2a
Rpl32	Hadha	Tiprl	Fas
Dnajb4	1700096K18Rik	Isy1	Gm3336
Kctd8	Orai3	Tigit	S100a13
Cox8a	Snapin	Ctdnep1	Traj41
Traj49	Vapa	Mxd4	Ndufa7
Rab6b	Ubqln1	Vps54	Cox5b
Serpina3g	Lrp10	Dock10	2810004N23Rik
Trav16d-dv11	Cxxc1	Ccl5	Epb41l4aos
S100a11	Slc25a44	Mapk1	Rpl11
Uqcrq	Vapb	Gnb4	Cd244a
Cryab	Psma3	Gdi2	Alad
Metap2	Xpo7	Impa2	Smim26
Atp5l	Agpat2	Ube2d3	Lgals1
mt-Nd3	Grsf1	Dynll2	Ifi27
Cdkn2a	Atf6	Gorasp2	Crim1
Rps11	Crebbp	Arl5c	Syngr1
mt-Atp8	Wbp11	Ube2j1	St3gal6
Snrpf	Cox7a2l	Fmnl1	Rab3ip
Rps19	Tfg	Perp	Uqcr10
Snrpn	Tmem198b	Dgat1	Ugcg
Cmss1	Wdr61	Akap13	Itga1
Ost4	Macf1	Sik3	Fam3c
Pdcd1lg2	Mta1	Snx9	Sdhaf4
Magohb	Pla2g15	Serinc3	Gng5
Ank3	Kdm3b	Il12rb2	Rps15
Hmgb2	Zdhhc6	Pon2	Rpl36al
Lgals3	N4bp1	Zc3hav1	Rps17
Ctsw	Irak1	Ogt	Serpina3f
Gm19585	Zmym2	Crem	Tnfsf10
Trav7-5	Necap2	Camk4	Cox7a2
Rps23	Etfa	Hnrnpa1	Gm10451
Eif2s2	Fbxo28	Nmrk1	Hhex
Itga4	Ptpn2	Slc9a3r1	Klf12
Ndufa4	Gm7247	Lag3	Igflr1
S100a10	Arhgap21	Etv6	B2m
Chn2	Mtmr14	Wac	Ndufb2
Mctp1	Gga1	Sdf2	Rpl27a
Qpct	Fcsk	Eif3d	Ndufc1
Tm6sf1	Rabac1	Irak2	Hacd2
Hsd11b1	Serp1	Rabgap1l	Ndufb4
Ndufb4	Mta2	Nab1	Hsd11b1
Hacd2	Fam91a1	P2ry10	Tm6sf1
Ndufc1	Cdk16	Crtc2	Qpct
Rpl27a	Tpra1	Gls	Mctp1
Ndufb2	Smc4	Trbj2-4	Chn2
B2m	Gm9725	Lmnb1	S100a10
Igflr1	Pou2f1	Igkv1-110	Ndufa4
Klf12	Gls2	Osbpl3	Itga4
Hhex	Dctn4	Rngtt	Eif2s2
Gm10451	Gm12316	Hip1r	Rps23
Cox7a2	Lemd2	Ccn4	Trav7-5
Tnfsf10	Selenot	Arpc3	Gm19585
Serpina3f	Gbp10	March7	Ctsw
Rps17	Rundc1	Pim1	Lgals3
Rpl36al	Zcchc7	Tulp4	Hmgb2
Rps15	Numb	Eif4h	Ank3
Gng5	Dph1	Serpinb9	Magohb
Sdhaf4	Mtx3	Tnfrsf1b	Pdcd1lg2
Fam3c	Ncoa2	Itpr1	Ost4
Itga1	Txlng	Prkca	Cmss1
Ugcg	Cyb561a3	Phlpp1	Snrpn
Uqcr10	Stip1	Cd6	Rps19
Rab3ip	Spg21	Gzme	Snrpf
St3gal6	Hspa13	Ostf1	mt-Atp8
Syngr1	Bcl2l13	Tinf2	Rps11
Crim1	Socs4	Gnb1	Cdkn2a
Ifi27	Gm34868	Arf4	mt-Nd3
Lgals1	Trim59	Ppp2ca	Atp5l
Smim26	Slc25a51	Ubl3	Metap2
Alad	Acadvl	Ndrg1	Cryab
Cd244a	Mkrn1	Smco4	Uqcrq
Rpl11	Marf1	Pkp3	S100a11
Epb41l4aos	Fam234a	Sh3rf1	Trav16d-dv11
2810004N23Rik	4930455C13Rik	Hadhb	Serpina3g
Cox5b	Izumo4	Nfkbib	Rab6b
Ndufa7	Rab18	Ndfip1	Traj49
Traj41	Tob2	Capza1	Cox8a
S100a13	Agfg1	Mgst2	Kctd8
Gm3336	Tjap1	Thap12	Dnajb4
Fas	Ankrd39	Adam17	Rpl32
Rnaset2a	Trim13	Sh3kbp1	Rpl26
AI413582	Zfp598	Rac1	Pet100
Rpl27	Card6	Rab8b	Cd55
Tpm1	Insig2	Mgat2	Ptp4a3
Ly6e	Tnf	Vps37b	Tmem223
Susd1	Mia2	Elf4	Filip1
Snhg3	Copa	Nfatc1	Rpl22l1
Ndufa2	Gm17606	Tgfb1	Dpp4
Pglyrp1	Dnajb9	Prkch	Hcst
Atox1	Asxl1	Sla	Cox20
Rps12	Rnf111	Ncf4	Cst7
Vmn2r96	Cdc42se1	Plekha2	H1fx
Arpp19	Gm26917	Edem1	Uqcr11
Rps7	Samd8	Kras	Rplp1
Fcer1g	Naa10	Lgals3bp	Sem1
Bloc1s1	Usp47	Csf1	Rps15a
Rpl24	Adk	Tnfaip3	Tmem258
Gm43042	Slpi	Arih1	Ptma
Samd3	Cep120	Tubb5	Ramp1
Snhg8	Rtn4	Snx20	Ndufa5
Ddx18	Atp11b	Tm7sf3	Dpm3
Pfdn2	Sacm1l	Trnt1	Cops9
Spry2	Rad23b	Spata13	Mdh2
Rps25	Arl6ip1	Wls	Uqcrb
Eomes	Mvb12a	Eif4e	Son
Eya2	Fasl	Morf4l2	2900026A02Rik
Eps8	Tmem165	Gpr132	Sp110
Trmt112	Armc10	Adipor1	Rpl31
Dnajc19	Rubcn	Ttc39c	Rps8
Llph	Spry1	Rab5a	Serpinb9b
Sh3bgrl3	Chmp1a	Laptm5	Trav8d-2
Klrd1	Ilf3	Cd80	Gm10260
Mrpl33	Stag1	Pde4d	Trav10d
Trav13-2	P4hb	Nefh	Ndufa13
Glmn	Myo1g	Gtdc1	Romo1
Hilpda	Lonrf1	Chp1	Atp5j2
Pkd2	Rbm15b	Phf20l1	Atp5j
Myl6	Acsl5	Btbd9	Upp1
Lat2	Mroh2a	Cyth4	Serf2
Trgv2	Aspg	Rnf43	1700097N02Rik
Ly6c1	Clpb	Golph3	5830405F06Rik
Btbd11	Zfp260	Bcl2a1d	Trav4-4-dv10
Cox6a1	Ikzf1	Il2ra	Rps13
Mt2	Pwwp2a	Ptp4a2	Hspe1-rs1
A530032D15Rik	Stim1	Serpinb6b	Tspan13
Pxdc1	Srsf7	Cul3	Ndufa1
Hist1h2bc	Erlin1	Nvl	Rps20
Rgs8	Grb2	Atrnl1	Rpl6
Wwtr1	Mtfr1l	Apba3	Mtus2
Cela1	Dmtf1	Tnfrsf9	Txk
Slc16a11	Cd99l2	Eif3e	H3f3b
Bend6	Nup98	Dusp4	Trav15-1-dv6-1
Klf7	Slc45a4	Actr1a	Trav13n-4
Dnaja4	Marcksl1	Gm47015	Krtcap3
Rnaseh2c	Fbxo6	Nek7	Polr2l
Ticam2	Kif20b	Tmem109	Rps27a
Dsp	Lrrc58	Wnk1	Rbis
Slc14a1	Cmtm6	Ipo7	Sp140
Rpl10	Slc35d1	Dusp5	Gm2682
Swap70	Aff1	Gjb2	Trav6-7-dv9
Hist1h4d	Card11	Dock11	Trbv3
Jaml	Brms1l	Heca	Trbv16
Nrarp	Mastl	Actn1	Klre1
Cenpw	Mysm1	Ms4a6d	Rps24
Hemk1	1810026B05Rik	Pbxip1	Rpl23
Ppp1r3b	Itgb2	Gm4022	Neurl3
Aldh2	Coq2	Cib2	Elob
A530040E14Rik	Mfsd14b	Nfkbie	Ndufb1-ps
Tra2b	Cct8	Plek	Gm11808
Anapc13	Zdhhc3	Slco3a1	Cd52
Ube2e2	Mgat4b	Alkbh5	Gm42418
Mylk	Yju2	Rhog	Rpl22
Gstp1	Ik	Gna15	Fgl2
Arhgef16	Setd3	Satb1	Trav10
Gspt2	Ddx6	Atp5b	Cox6c
Rps16	Afm	Flna	Mrpl52
Zbtb40	Raet1e	Gtpbp2	Trav9-4
Selenon	Mib1	Ctla4	Bola2
Dst	Paxbp1	Ints11	Trav7-1
Gm11998	Cpped1	Rilpl2	E330020D12Rik
Ubl5	Atp6ap1	Prkce	Cox17
Cetn3	Mbd5	Tpst2	Trav12-3
Gm36738	Nedd9	Galnt2	Ndufa3
Gm13822	Pakap-1	Kmt2e	Rpl30
Rps27l	Fam129a	Mrm1	Trbv19
Trav16	Il1r2	Rab21	Ly6c2
Tbc1d32	Ambra1	Icos	Zfp182
Evi5	Aamp	Fam189b	Bcl2
BC024063	Trmt12	Jak3	Uba52
Cdc14b	Top2b	Cxcr6	Rpl21
Atf3	Zfp236	Vasp	Atp5md
Sec11c	Gtf2b	Rab4a	Trdv1
Nkapd1	Galnt14	Atmin	Atp5k
Zfp583	Tubgcp3	Luc7l2	Trbv15
Pin4	Ripk1	Trps1	Fau
Ikzf2	Rpn1	Dazap1	Snrpg
Mypop	Srrm1	Sla2	Tomm7
Pik3r1	Igkv6-23	Gm15283	Trbj2-1
Arnt2	Terf1	Eea1	Atp5mpl
Naip2	Snx21	Fam120a	Atp5e
Rpl14	Siah1a	Ptprj	Rplp2
Nop10	Naa15	Lalba	Sec61g
Ret	Zfyve16	Baz1a	S100a6
Xlr3b	Taz	Slc22a15	Trbv31
Ugt1a7c	Tubb6	Adipor2	Spp1
Glb1	Calr	S1pr4	Trav4-3
Slirp	Gm38250	Hnrnpf	Trbv5
Pfdn1	Dlst	Tle5	Rps26
Isg20	Traj52	Ptms	Cox7c
Cenpv	Gm7030	Slc37a2	Rpl34
Gramd4	Zfp1	Trpc1	Tmsb10
Ttk	Limd2	Gabrr1	Rpl36a
Emilin2	Tbc1d14	Bcl3	Trbv29
Fam78b	Ndst1	Anxa2	Rpl35a
Cmc1	Ctnnbl1	Rplp0	Trav3-3
Gmnn	Psmd10	Adora2a	Rpl36
Atp13a4	Abhd4	Cenpa	Trav13-4-dv7
App	Fancf	Zbtb1	Trbc1
Adgrb2	Tbkbp1	Psmc6	Rps27
Actr1b	Gm26724	Prrc2c	Rpl35
Tpsab1	Ccdc6	Exph5	Plac8
Capg	Actr10	Map2k2	Rps21
Srgn	Fosl2	Eif4a1	Rpl37a
Baiap2l1	Kpnb1	Usp1	Rpl41
Pcolce	Tbl3	Ammecr1l	Rps28
Morn3	Maml2	Coro1a	Rps29
Gimap7	C430042M11Rik	Eno1	Rpl37
H2-Q1	Tmem29	Nptn	Rpl39
Gucy1b1	Gxylt1	Kansl1	Rpl38
1500015A07Rik	Cnot6	Gzmd	Trav13d-4
Gimap5	Rbks	Ncoa1	Trbv1
	Rfxap	Nr4a2
	Tbl1x	Sumf2
	H2-Oa	Ccnk
	Ap2m1	Npl
	Ilk	Ubxn7
	Itk	Sntb1
	Atf7ip	Luzp1
	Hint2	Grk2
	Pim2	Tspan14
	Hbp1	Gm35082
	Erp44	Cd3e
	Nup54	Gna13
	Dennd1c	Gnas
	Med25	Setd5
	Gys1	Tab2
	Usf2	Kmt2b
	Abracl	Sec23a
	H2afy	Tank
	Bsdc1	Tkt
	Acer3	Csrnp1
	Stox1	Gramd1b
	Pkn1	Sec61a1
	Arl1	Atp6v0d1
	Khdc4	Hnrnpk
	Prrt1	Copb1
	3110001I22Rik	Pls1
	Slc9a5	Kctd17
	Ccnl1	Zfp772
	Slc35b1	Cytip
	Tnfaip1	Prpf38b
	Lamp2	Gadd45b
	Npc2	H2-T23
	Cndp2	Hacd3
	Rab1a	Bcl2a1b
	Hyls1	Orai1
	Slc38a9	Yipf3
	Ess2	Nudt4
	Fam124b	Tprgl
	Snx17	Traf3
	Neil1	Serinc1
	Fbxo44	Raly
	Dot1l	Tlnrd1
	Gm15083	Abhd8
	Cbx4	Rbck1
	Gm36043	Mknk2
	Stx18	Prkab1
	Tcf7	Psma4
	C1qtnf12	Tmem70
	Gm43466	Fth1
	AI837181	Dnajb13
	Ankib1	Igbp1
	Nrip1	Pianp
	Il1a	Tgif1
	Sp4	Cd7
	Ypel5	Akirin1
	Pld4	Runx3
	Apaf1	Ssh2
	5031425E22Rik	Tapbp
	Zfp959	Ncald
	Setdb2	D630039A03Rik
	St3gal3	Ywhae
	Cd1d1	Ppp6c
	Gpbp1l1	Luc7l
	Hdac9	Itm2c
	Oxld1	Picalm
	Il18rap	Dxo
	Mecr	Plcl1
	Csnk1a1	Elovl5
	Chmp4b	Pnrc1
	Gm2a	Nabp1
	Ncaph2	Tcp11l2
	Jdp2	Ms4a4b
	1810013L24Rik	Ywhaz
	Klf16	Wipi2
	Stx12	Gm46620
	Ppp1r15b	Uqcc1
	Ppp1r15a	Ppic
	Larp1b	Ube2g1
	Dennd3	Mkln1
	Fbxl3	Gtf2e2
	Gpatch3	Fam160b1
	Slc6a6	Rasd2
	Uchl5	Cnot6l
	Zfp39	Mbnl1
	Psap	Trpc4ap
	Zbtb25	Ifnar1
	Cdkl5	Ccni
	Gnaq	Madd
	Arel1	Itga3
	Ythdf1	Slmap
	Ermp1	Samd4b
	Chmp4c	Sec22b
	Pak6	Ctnnb1
	Hspa2	Bcl2l1
	Tstd3	1700030N03Rik
	Ankrd52	Zyx
	Slc38a10	Wdr26
	Gm48719	Fbxl18
	Lmbr1l	Magi1
	Kpna1	Mbd2
	Trak2	Iglv1
	Traf2	Ppp1r16b
	Aff3	H2-T22
	Gm10655	Pink1
	A930024E05Rik	Mest
	Mtch1	1500011B03Rik
	Eps8l3	Epas1
	Siglecf	Ssr3
	Khdrbs1	Osbp
	Trim45	Unc119b
	Mafa	Ubn2
	Sec23ip	Zfp36
	Slc30a4	Ino80b
	Selenof	Arpc1b
	Tmx3	Hivep2
	Tbc1d17	Iqgap1
	Arf5	Ldb1
	Col4a3bp	Lcn4
	Wdfy1	Osbpl9
	Gm6169	Cd226
	Cldnd1	Ivns1abp
	Wnt11	Nab2
	C730002L08Rik	Fli1
	Gm11110	Larp4b
	Cdv3	Mbp
	Farp1	Chaf1a
	Ipo5	Sh3bp5l
	Pxn	Ctbp1
	Rbm25	Npnt
	Gpatch8	Poldip3
	Tecpr1	Ube2b
	Tnfsf11	Rbm42
	Gpi1	Nfkbiz
	Gpatch2	Zmiz2
	Pnpla8	Sec14l1
	Cd8a	Furin
	Ncaph	Hivep1
	Skap2	AI597479
	Calu	Capzb
	Sh3glb2	Ogfr
	Nr3c2	Rab11a
	Eps15l1	Nacc1
	Smap2	mt-Cytb
	Tbc1d20	Scyl2
	Dmap1	Gm49180
	Zfp119a	Fam174b
	Pou2f2	Eif3f
	Cpne1	Stat5a
	Casc4	Atp1a1
	Sos2	Spin4
	Gmfg	Pfkl
	Nipbl	Dr1
	9830144P21Rik	Hipk2
	Gatad2a	Celf2
	Polr1d	Copz1
	Lfng	Otud4
	Pitpnc1	Havcr2
	Csk	Nadk
	Chst11	Dcaf7
	Myef2	Stk10
	St7l	Gbp6
	Ighv5-12	Btg1
	Rasd1	Amfr
	Fuca2	Baz2a
	Mdfic	Etfdh
	Npepl1	Sin3b
	Taf6l	Rpl3
	Gm43462	Agpat1
	Bscl2	Ric1
	Ugt1a10	Zfp207
	Zbtb43	Rab39b
	Oat	Fam107b
	Eipr1	Gsdmd
	Marveld1	Stat5b
	Enox1	Spn
	Vps13b	Prkx
	Cntrl	Gzmg
	Supt6	Ptger2
	Nelfa	AA467197
	Clk3	Nrbp1
	Angel2	Prdm1
	Gnai3	Rpn2
	Supt5	Plcb2
	Pik3r4	Trim28
	Med14	Wsb1
	Nmt1	Tnip1
	Eif4b	Meis3
	Tmem33	Ube2d2a
	Gbp3	Spata5l1
	Atp2b2	Socs7
	Rfwd3	Emsy
	Osbpl8	Elavl1
	Tcf20	Arl15
	Ypel2	Dhrs1
	Ccdc148	Pdia3
	Tlr13	Gm10804
	Ago1	Nfkb1
	Pgrmc1	B4galnt1
	Tmem50b	Pcyt1a
	Sumo1	Arntl
	Plekha5	Rock1
	Ap1b1	Gdi1
	Cyb5r4	Traj38
	Pin1	Arpc4
	Rnf187	Rnf125
	Tdg	Rest
	Tmem135	Gpr107
	G3bp2	Fbxo11
	Hnrnpll	Bhlhe40
	Gm44066	Man1a2
	Prpf39	Fam117b
	Ralgapb	Lrrc4
	Gm37240	Gse1
	Rap1gds1	Trerf1
	Setx	Klrk1
	Ppp1cb	Socs3
	4833439L19Rik	Ube2j2
	Gm45669	Ptbp3
	Mat2b	Pdcd6ip
	Ifngr1	Emd
	Tbc1d15	mt-Co3
	Rela	Ssr1
	Hibadh	Pcgf5
	Ptdss1	Acaa2
	Gm47167	Cdk12
	Sf3a1	Cct4
	Dcaf12	Tmf1
	Agpat4	Rab10
	Suz12	Use1
	Tuft1	Mlf2
	Foxp1	Chst12
	Rev3l	Slc3a2
	Rnf145	Hbs1l
	Ubr2	Bak1
	Vti1a	Rnf10
	Zbed3	Trabd
	Mid1ip1	Setd2
	Cat	Hspa5
	Zfp335	Copg1
	Psmc2	Esyt2
	Ptcd2	Smarcd2
	Sirt2	A530041M06Rik
	Ahnak	Ctu2
	Slc25a28	Hmces
	Sec13	Blmh
	Phf8	Sft2d2
	Nr1h2	Slc37a3
	Ogdh	Coch
	Itsn1	Fam222b
	Ldlrad4	Gm26740
	Zc3h12d	Atrx
	Flnb	Dapk3
	Tmem183a	Casp1
	Sh3glb1	Rassf5
	Gm28379	Tmed5
	Rps6ka1	Akap10
	Cyb5b	Stx5a
	Ppp2r5a	Ndufs2
	Uqcrc2	Arid5a
	Ccng2	Atxn2l
	Cs	Ccnt1
	Cnot8	mt-Nd4
	Ifrd1	Adgre5
	Sf1	Slc30a9
	Psmc4	Tnfrsf18
	Ube2z	Fbxw11
	Becn1	Ywhah
	Tgoln1	Actg1
	Nup50	Hmbox1
	Cflar	Mrps6
	Fam178b	1700017B05Rik
	Rnf20	Usp38
	Chchd10	Jund
	Ndufs1	Rab35
	Spsb3	Cbfb
	Brd4	Iffo1
	Nras	Prpf40a
	Atp2a2	Hif1a
	Acot11	Wdr1
	Cct7	Atg4b
	Fam122a	Pitpna
	Hexb	Gstp3
	Gm11707	Dcaf17
	Zdhhc2	Snx5
	Mfsd6	Txn1
	Trafd1	Srsf4
	Fam13b	Sdcbp
	Usp39	Phf23
	Tmem127	Chmp1b
	Rbpj	Ptpn22
	Gsto1	Chpf2
	Zfp973	Cdyl2
	Tmed7	Rhoa
	Eif3m	Lcp2
	Hras	Zscan29
	Emp3	Dlg1
	Dgka	Ube2n
	Crk	Wapl
	Tbc1d10a	Xlr4a
	Agpat5	Nat2
	Cog3	Hat1
	Usp4	Dennd5a
	Pdha1	Ctsb
	Hadh	Snd1
	Gltp	Cnppd1
	Mapk8	Klf13
	Unc93b1	Smim7
	Irf8	Tnfrsf14
	Senp6	Baiap2
	Ddrgk1	Pten
	Pkp4	Surf4
	Prr5	Krit1
	Phb2	Bmt2
	Rnpep	Naa60
	Alcam	Ranbp9
	Smg1	Ncor1
	Ercc6l2	Dpf2
	Prelid3b	Tnfaip8
	Exoc4	Fcho1
	Ube3a	Cacfd1
	Pag1	B3gnt2
	4930579G24Rik	Txnl1
	Cutc	Cep41
	Ubr4	Lims1
	Ube2l6	Yy1
	Avpi1	Rassf1
	Itgb1	Ssbp4
	Cd53	Strip1
	Akr1a1	Ern1
	Spen	Pabpc1
	Arrdc1	H2-D1
	Pds5b	Acadl
	Aida	Clasp2
	Cercam	Trip12
	Ubxn4	Smarca5
	Cry1	Ttpal
	Dock2	Pde1c
	Cpsf2	Lnx2
	Chd1	Kdelr2
	Cep83	Tmem115
	Insyn2b	Tent4b
	Gm36287	Il18bp
	Purb	Prxl2a
	Ebp	Got1
	Gin1	Degs1
	Gm12840	Kdelr1
	Foxn3	Adarb2
	Trappc8	9530068E07Rik
	Eif2ak3	Camk2n1
	Slc12a6	Prkcz
	Zhx1	Arih2
	Kpna3	Rapgef1
	C1ra	Ptpn1
	Gnb5	Egln3
	Paip2	Limd1
	Nsmce4a	Eif6
	Rgs1	Bcl2a1c
	Ezh2	Frmd8
	Nisch	Gm47769
	Wbp2	Ptpra
	Polr2m	Cops4
	Zer1	Ncor2
	Get4	Keap1
	Psmd8	Impad1
	Rabgef1	Rnf40
	Ccnf	Gm42722
	E130308A19Rik	Ap3b1
	Tbc1d1	Nudt18
	Zfr	Snrnp70
	Ppfia1	Sumo2
	Ahcy	Ltk
	Sgk1	Anxa11
	Zfp418	Memo1
	Coro1b	Pcnp
	Tgfbr2	BC005537
	Khnyn	Panx1
	Smyd2	Cisd2
	Sephs2	Nfatc3
	Emc10	Tm4sf19
	Ccnt2	Hdlbp
	Cdc27	Cd2
	Egr1	Plekhb2
	Msn	Arpc5
	Zfp384	Aak1
	Gm13571	Paics
	Pcyox1	Hsd17b11
	Capns1	Pde4b
	Atg4c	Prps2
	Hax1	Casp3
	Cd2bp2	Smpdl3b
	Gapvd1	Rnf4
	Rsbn1	Lgals7
	Art2b	Ust
	Ddx47	Usp48
	Mob4	Echdc2
	Sema4d	Rpl4
	Pfdn5	Trim12c
	Parp4	Maea
	Nxt1	Tmprss6
	Lin7c	Ppp2r1b
	Mrfap1	Ier3
	Dip2b	Ube2v1
	Zbtb48	Gnai2
	Oaz1	Setbp1
	Ndufv1	Kmt2d
	Rad21	Gpm6b
	Ddb2	Rbbp4
	Ppp4r3b	Ceacam1
	Nelfb	Cltc
	Tff1	Phax
	Sec63	Itpripl1
	Zfp90	Pofut1
	Ubl7	Xylt1
	Klf8	Dennd2d
	Dnajc13	Mob2
	Gatad2b	Pcnx
	Ermn	Slc28a2
	Snx25	Gm42921
	Arhgap18	Rreb1
	Flii	Cd5
	Tut7	Ripk2
	Sptlc2	Rhbdf2
	Kmt2a	Stk40
	Sf3b4	Rab9
	Phip	H2-K1
	Cdc42	Igf2r
	Sgpl1	Slain1
	Ocel1	Paf1
	Tmbim6	Pms2
	Slc25a19	4932438A13Rik
	Rabl3	Lrrc59
	Gm8066	Ostm1
	Hsd17b12	Smarca4
	Pdxdc1	Rap1b
	Avl9	Rps6ka3
	Trp53	Stk11
	Szrd1	Arl2bp
	Cwc27	Fgfbp3
	Cops2	Galnt1
	4833420G17Rik	Tmbim1
	Pdcd6	Scamp3
	Plcl2	Napa
	Eif5	Adam8
	Prss12	Dhcr24
	U2af2	Rabggtb
	Kcmf1	Faim
	Gorab	Gch1
	Cited2	Clptm1
	Ankrd11	Nop53
	Taf9b	Tbc1d31
	Dock5	Cpt1a
	Ptpa	Jmjd1c
	Smpdl3a	Samhd1
	Gzmb	Bub3
	Cdk9	Bdh1
	Taok1	Akt1
	Larp4	Ghitm
	Ddx5	Man2b2
	Snx3	Gtf2i
	Tet3	Ttll12
	Brd2	Txndc9
	Dcun1d5	Acss2
	Gm33728	mt-Nd5
	Stk17b	Trpm7
	Rapgef2	Prr7
	Rel	Tnnt1
	Smarca2	Gpr171
	Hsf1	Maml3
	Miga1	Aftph
	Cnot11	Gemin7
	Gdap2	Kdm6a
	Stt3b	Prr13
	Gpx4	Rack1
	Nsd3	Ggnbp2
	Phospho2	Xpot
	Capn2	Msrb1
	As3mt	Anapc7
	Bcl7c	Akirin2
	mt-Nd1	Zyg11b
	Ociad1	Phf5a
	Gba	Srebf2
	Bend5	Glis1
	Rps6kb1	Cxcr3
	Csnk1g3	Hinfp
	Vash1	Tm2d3
	Ralgds	Ubr5
	Rnf166	Sipa1l1
	Hgsnat	Fkbp1a
	Pdk3	Drg1
	Chtop	Unc119
	Desi1	Rtraf
	Rcn3	Pds5a
	Klrc1	Dusp6
	Crebrf	Tctex1d2
	M6pr	Znrf2
	Atg101	Cfl1
	Gbp9	Rbm6
	Lnpep	Snapc3
	Mtfr1	Ppm1m
	Rnf114	Capza2
	Stau1	Baz1b
	Lrrc8d	Cab39
	Abcc1	H2afx
	Gm34777	Nop2
	Ubxn2a	Rhof
	Atf6b	Lypla1
	Atg16l2	Lzic
	Cdk13	Togaram1
	Slc39a11	Txndc5
	Slc30a1	Fbxw2
	Csnk1d	B4galt1
	Gak	Itsn2
	Brms1	Cept1
	Zfc3h1	Entpd1
	Elmo1	Ell2
	Tmem168	Atp6v0c
	Cdca4	Oser1
	Tmem65	Arl13b
	Stx6	Slc30a7
	Med1	Srsf11
	Klhl24	Thy1
	Gstt1	Chic2
	Arid1b	Arid1a
	Tent2	Smad7
	Ano6	Ss18
	Fbxo33	Rsph3b
	Cybc1	Ewsr1
	Nudt6	Ints8
	Ndel1	Zcchc14
	Fyn	Rexo1
	Hnrnph2	Cdc42se2
	Tbc1d10b	Hid1
	Agpat3	Mdh1
	Arhgap30	Chd2
	1700123O20Rik	Rab33b
	Ccl3	Dld
	Mcrip1	Zfp827
	Tent5c	Arpc1a
	Uba5	Rpl10-ps3
	H2-Q10	Slk
	Sema7a	D16Ertd472e
	Ric8a	Tm9sf3
	Bri3bp	Gm31597
	Asb3	Cers5
	Ighv5-4	Vps13d
	Gapdh	Psmd14
	Gpr183	Abcc4
	Gm867	Eif3g
	Relb	Myl12b
	Dusp16	Tg
	Cd28	Fnbp1
	Kansl2	Terf2ip
	Nt5c	Slc38a1
	Myd88	Nfat5
	Sike1	Zfp942
	Ssna1	Rab2a
	Smu1	Srsf3
	Gypc	Ncam1
	Rab43	Zfx
	Zfp775	Psma5
	Mcu	Taf15
	Adss	Snrnp40
	Pik3r5	Trav14-3
	Tcrg-V3	Ankrd13a
	Rtl8c	Lsp1
	Plagl2	Plagl2
	Lsp1	Rtl8c
	Ankrd13a	Tcrg-V3
	Trav14-3	Pik3r5
	Snrnp40	Adss
	Taf15	Mcu
	Psma5	Zfp775
	Zfx	Rab43
	Ncam1	Gypc
	Srsf3	Smu1
	Rab2a	Ssna1
	Zfp942	Sike1
	Nfat5	Myd88
	Slc38a1	Nt5c
	Terf2ip	Kansl2
	Fnbp1	Cd28
	Tg	Dusp16
	Myl12b	Relb
	Eif3g	Gm867
	Abcc4	Gpr183
	Psmd14	Gapdh
	Vps13d	Ighv5-4
	Cers5	Asb3
	Gm31597	Bri3bp
	Tm9sf3	Ric8a
	D16Ertd472e	Sema7a
	Slk	H2-Q10
	Rpl10-ps3	Uba5
	Arpc1a	Tent5c
	Zfp827	Mcrip1
	Dld	Ccl3
	Rab33b	1700123O20Rik
	Chd2	Arhgap30
	Mdh1	Agpat3
	Hid1	Tbc1d10b
	Cdc42se2	Hnrnph2
	Rexo1	Fyn
	Zcchc14	Ndel1
	Ints8	Nudt6
	Ewsr1	Cybc1
	Rsph3b	Fbxo33
	Ss18	Ano6
	Smad7	Tent2
	Arid1a	Arid1b
	Chic2	Gstt1
	Thy1	Klhl24
	Srsf11	Med1
	Slc30a7	Stx6
	Arl13b	Tmem65
	Oser1	Cdca4
	Atp6v0c	Tmem168
	Ell2	Elmo1
	Entpd1	Zfc3h1
	Cept1	Brms1
	Itsn2	Gak
	B4galt1	Csnk1d
	Fbxw2	Slc30a1
	Txndc5	Slc39a11
	Togaram1	Cdk13
	Lzic	Atg16l2
	Lypla1	Atf6b
	Rhof	Ubxn2a
	Nop2	Gm34777
	H2afx	Abcc1
	Cab39	Lrrc8d
	Baz1b	Stau1
	Capza2	Rnf114
	Ppm1m	Mtfr1
	Snapc3	Lnpep
	Rbm6	Gbp9
	Cfl1	Atg101
	Znrf2	M6pr
	Tctex1d2	Crebrf
	Dusp6	Klrc1
	Pds5a	Rcn3
	Rtraf	Desi1
	Unc119	Chtop
	Drg1	Pdk3
	Fkbp1a	Hgsnat
	Sipa1l1	Rnf166
	Ubr5	Ralgds
	Tm2d3	Vash1
	Hinfp	Csnk1g3
	Cxcr3	Rps6kb1
	Glis1	Bend5
	Srebf2	Gba
	Phf5a	Ociad1
	Zyg11b	mt-Nd1
	Akirin2	Bcl7c
	Anapc7	As3mt
	Msrb1	Capn2
	Xpot	Phospho2
	Ggnbp2	Nsd3
	Rack1	Gpx4
	Prr13	Stt3b
	Kdm6a	Gdap2
	Gemin7	Cnot11
	Aftph	Miga1
	Maml3	Hsf1
	Gpr171	Smarca2
	Tnnt1	Rel
	Prr7	Rapgef2
	Trpm7	Stk17b
	mt-Nd5	Gm33728
	Acss2	Dcun1d5
	Txndc9	Brd2
	Ttll12	Tet3
	Gtf2i	Snx3
	Man2b2	Ddx5
	Ghitm	Larp4
	Akt1	Taok1
	Bdh1	Cdk9
	Bub3	Gzmb
	Samhd1	Smpdl3a
	Jmjd1c	Ptpa
	Cpt1a	Dock5
	Tbc1d31	Taf9b
	Nop53	Ankrd11
	Clptm1	Cited2
	Gch1	Gorab
	Faim	Kcmf1
	Rabggtb	U2af2
	Dhcr24	Prss12
	Adam8	Eif5
	Napa	Plcl2
	Scamp3	Pdcd6
	Tmbim1	4833420G17Rik
	Galnt1	Cops2
	Fgfbp3	Cwc27
	Arl2bp	Szrd1
	Stk11	Trp53
	Rps6ka3	Avl9
	Rap1b	Pdxdc1
	Smarca4	Hsd17b12
	Ostm1	Gm8066
	Lrrc59	Rabl3
	4932438A13Rik	Slc25a19
	Pms2	Tmbim6
	Paf1	Ocel1
	Slain1	Sgpl1
	Igf2r	Cdc42
	H2-K1	Phip
	Rab9	Sf3b4
	Stk40	Kmt2a
	Rhbdf2	Sptlc2
	Ripk2	Tut7
	Cd5	Flii
	Rreb1	Arhgap18
	Gm42921	Snx25
	Slc28a2	Ermn
	Pcnx	Gatad2b
	Mob2	Dnajc13
	Dennd2d	Klf8
	Xylt1	Ubl7
	Pofut1	Zfp90
	Itpripl1	Sec63
	Phax	Tff1
	Cltc	Nelfb
	Ceacam1	Ppp4r3b
	Rbbp4	Ddb2
	Gpm6b	Rad21
	Kmt2d	Ndufv1
	Setbp1	Oaz1
	Gnai2	Zbtb48
	Ube2v1	Dip2b
	Ier3	Mrfap1
	Ppp2r1b	Lin7c
	Tmprss6	Nxt1
	Maea	Parp4
	Trim12c	Pfdn5
	Rpl4	Sema4d
	Echdc2	Mob4
	Usp48	Ddx47
	Ust	Art2b
	Lgals7	Rsbn1
	Rnf4	Gapvd1
	Smpdl3b	Cd2bp2
	Casp3	Hax1
	Prps2	Atg4c
	Pde4b	Capns1
	Hsd17b11	Pcyox1
	Paics	Gm13571
	Aak1	Zfp384
	Arpc5	Msn
	Plekhb2	Egr1
	Cd2	Cdc27
	Hdlbp	Ccnt2
	Tm4sf19	Emc10
	Nfatc3	Sephs2
	Cisd2	Smyd2
	Panx1	Khnyn
	BC005537	Tgfbr2
	Pcnp	Coro1b
	Memo1	Zfp418
	Anxa11	Sgk1
	Ltk	Ahcy
	Sumo2	Ppfia1
	Snrnp70	Zfr
	Nudt18	Tbc1d1
	Ap3b1	E130308A19Rik
	Gm42722	Ccnf
	Rnf40	Rabgef1
	Impad1	Psmd8
	Keap1	Get4
	Ncor2	Zer1
	Cops4	Polr2m
	Ptpra	Wbp2
	Gm47769	Nisch
	Frmd8	Ezh2
	Bcl2a1c	Rgs1
	Eif6	Nsmce4a
	Limd1	Paip2
	Egln3	Gnb5
	Ptpn1	C1ra
	Rapgef1	Kpna3
	Arih2	Zhx1
	Prkcz	Slc12a6
	Camk2n1	Eif2ak3
	9530068E07Rik	Trappc8
	Adarb2	Foxn3
	Kdelr1	Gm12840
	Degs1	Gin1
	Got1	Ebp
	Prxl2a	Purb
	Il18bp	Gm36287
	Tent4b	Insyn2b
	Tmem115	Cep83
	Kdelr2	Chd1
	Lnx2	Cpsf2
	Pde1c	Dock2
	Ttpal	Cry1
	Smarca5	Ubxn4
	Trip12	Cercam
	Clasp2	Aida
	Acadl	Pds5b
	H2-D1	Arrdc1
	Pabpc1	Spen
	Ern1	Akr1a1
	Strip1	Cd53
	Ssbp4	Itgb1
	Rassf1	Avpi1
	Yy1	Ube2l6
	Lims1	Ubr4
	Cep41	Cutc
	Txnl1	4930579G24Rik
	B3gnt2	Pag1
	Cacfd1	Ube3a
	Fcho1	Exoc4
	Tnfaip8	Prelid3b
	Dpf2	Ercc6l2
	Ncor1	Smg1
	Ranbp9	Alcam
	Naa60	Rnpep
	Bmt2	Phb2
	Krit1	Prr5
	Surf4	Pkp4
	Pten	Ddrgk1
	Baiap2	Senp6
	Tnfrsf14	Irf8
	Smim7	Unc93b1
	Klf13	Mapk8
	Cnppd1	Gltp
	Snd1	Hadh
	Ctsb	Pdha1
	Dennd5a	Usp4
	Hat1	Cog3
	Nat2	Agpat5
	Xlr4a	Tbc1d10a
	Wapl	Crk
	Ube2n	Dgka
	Dlg1	Emp3
	Zscan29	Hras
	Lcp2	Eif3m
	Rhoa	Tmed7
	Cdyl2	Zfp973
	Chpf2	Gsto1
	Ptpn22	Rbpj
	Chmp1b	Tmem127
	Phf23	Usp39
	Sdcbp	Fam13b
	Srsf4	Trafd1
	Txn1	Mfsd6
	Snx5	Zdhhc2
	Dcaf17	Gm11707
	Gstp3	Hexb
	Pitpna	Fam122a
	Atg4b	Cct7
	Wdr1	Acot11
	Hif1a	Atp2a2
	Prpf40a	Nras
	Iffo1	Brd4
	Cbfb	Spsb3
	Rab35	Ndufs1
	Jund	Chchd10
	Usp38	Rnf20
	1700017B05Rik	Fam178b
	Mrps6	Cflar
	Hmbox1	Nup50
	Actg1	Tgoln1
	Ywhah	Becn1
	Fbxw11	Ube2z
	Tnfrsf18	Psmc4
	Slc30a9	Sf1
	Adgre5	Ifrd1
	mt-Nd4	Cnot8
	Ccnt1	Cs
	Atxn2l	Ccng2
	Arid5a	Uqcrc2
	Ndufs2	Ppp2r5a
	Stx5a	Cyb5b
	Akap10	Rps6ka1
	Tmed5	Gm28379
	Rassf5	Sh3glb1
	Casp1	Tmem183a
	Dapk3	Flnb
	Atrx	Zc3h12d
	Gm26740	Ldlrad4
	Fam222b	Itsn1
	Coch	Ogdh
	Slc37a3	Nr1h2
	Sft2d2	Phf8
	Blmh	Sec13
	Hmces	Slc25a28
	Ctu2	Ahnak
	A530041M06Rik	Sirt2
	Smarcd2	Ptcd2
	Esyt2	Psmc2
	Copg1	Zfp335
	Hspa5	Cat
	Setd2	Mid1ip1
	Trabd	Zbed3
	Rnf10	Vti1a
	Bak1	Ubr2
	Hbs1l	Rnf145
	Slc3a2	Rev3l
	Chst12	Foxp1
	Mlf2	Tuft1
	Use1	Suz12
	Rab10	Agpat4
	Tmf1	Dcaf12
	Cct4	Sf3a1
	Cdk12	Gm47167
	Acaa2	Ptdss1
	Pcgf5	Hibadh
	Ssr1	Rela
	mt-Co3	Tbc1d15
	Emd	Ifngr1
	Pdcd6ip	Mat2b
	Ptbp3	Gm45669
	Ube2j2	4833439L19Rik
	Socs3	Ppp1cb
	Klrk1	Setx
	Trerf1	Rap1gds1
	Gse1	Gm37240
	Lrrc4	Ralgapb
	Fam117b	Prpf39
	Man1a2	Gm44066
	Bhlhe40	Hnrnpll
	Fbxo11	G3bp2
	Gpr107	Tmem135
	Rest	Tdg
	Rnf125	Rnf187
	Arpc4	Pin1
	Traj38	Cyb5r4
	Gdi1	Ap1b1
	Rock1	Plekha5
	Arntl	Sumo1
	Pcyt1a	Tmem50b
	B4galnt1	Pgrmc1
	Nfkb1	Ago1
	Gm10804	Tlr13
	Pdia3	Ccdc148
	Dhrs1	Ypel2
	Arl15	Tcf20
	Elavl1	Osbpl8
	Emsy	Rfwd3
	Socs7	Atp2b2
	Spata5l1	Gbp3
	Ube2d2a	Tmem33
	Meis3	Eif4b
	Tnip1	Nmt1
	Wsb1	Med14
	Trim28	Pik3r4
	Plcb2	Supt5
	Rpn2	Gnai3
	Prdm1	Angel2
	Nrbp1	Clk3
	AA467197	Nelfa
	Ptger2	Supt6
	Gzmg	Cntrl
	Prkx	Vps13b
	Spn	Enox1
	Stat5b	Marveld1
	Gsdmd	Eipr1
	Fam107b	Oat
	Rab39b	Zbtb43
	Zfp207	Ugt1a10
	Ric1	Bscl2
	Agpat1	Gm43462
	Rpl3	Taf6l
	Sin3b	Npepl1
	Etfdh	Mdfic
	Baz2a	Fuca2
	Amfr	Rasd1
	Btg1	Ighv5-12
	Gbp6	St7l
	Stk10	Myef2
	Dcaf7	Chst11
	Nadk	Csk
	Havcr2	Pitpnc1
	Otud4	Lfng
	Copz1	Polr1d
	Celf2	Gatad2a
	Hipk2	9830144P21Rik
	Dr1	Nipbl
	Pfkl	Gmfg
	Spin4	Sos2
	Atp1a1	Casc4
	Stat5a	Cpne1
	Eif3f	Pou2f2
	Fam174b	Zfp119a
	Gm49180	Dmap1
	Scyl2	Tbc1d20
	mt-Cytb	Smap2
	Nacc1	Eps15l1
	Rab11a	Nr3c2
	Ogfr	Sh3glb2
	Capzb	Calu
	AI597479	Skap2
	Hivep1	Ncaph
	Furin	Cd8a
	Sec14l1	Pnpla8
	Zmiz2	Gpatch2
	Nfkbiz	Gpi1
	Rbm42	Tnfsf11
	Ube2b	Tecpr1
	Poldip3	Gpatch8
	Npnt	Rbm25
	Ctbp1	Pxn
	Sh3bp5l	Ipo5
	Chaf1a	Farp1
	Mbp	Cdv3
	Larp4b	Gm11110
	Fli1	C730002L08Rik
	Nab2	Wnt11
	Ivns1abp	Cldnd1
	Cd226	Gm6169
	Osbpl9	Wdfy1
	Lcn4	Col4a3bp
	Ldb1	Arf5
	Iqgap1	Tbc1d17
	Hivep2	Tmx3
	Arpc1b	Selenof
	Ino80b	Slc30a4
	Zfp36	Sec23ip
	Ubn2	Mafa
	Unc119b	Trim45
	Osbp	Khdrbs1
	Ssr3	Siglecf
	Epas1	Eps8l3
	1500011B03Rik	Mtch1
	Mest	A930024E05Rik
	Pink1	Gm10655
	H2-T22	Aff3
	Ppp1r16b	Traf2
	Iglv1	Trak2
	Mbd2	Kpna1
	Magi1	Lmbr1l
	Fbxl18	Gm48719
	Wdr26	Slc38a10
	Zyx	Ankrd52
	1700030N03Rik	Tstd3
	Bcl2l1	Hspa2
	Ctnnb1	Pak6
	Sec22b	Chmp4c
	Samd4b	Ermp1
	Slmap	Ythdf1
	Itga3	Arel1
	Madd	Gnaq
	Ccni	Cdkl5
	Ifnar1	Zbtb25
	Trpc4ap	Psap
	Mbnl1	Zfp39
	Cnot6l	Uchl5
	Rasd2	Slc6a6
	Fam160b1	Gpatch3
	Gtf2e2	Fbxl3
	Mkln1	Dennd3
	Ube2g1	Larp1b
	Ppic	Ppp1r15a
	Uqcc1	Ppp1r15b
	Gm46620	Stx12
	Wipi2	Klf16
	Ywhaz	1810013L24Rik
	Ms4a4b	Jdp2
	Tcp11l2	Ncaph2
	Nabp1	Gm2a
	Pnrc1	Chmp4b
	Elovl5	Csnk1a1
	Plcl1	Mecr
	Dxo	Il18rap
	Picalm	Oxld1
	Itm2c	Hdac9
	Luc7l	Gpbp1l1
	Ppp6c	Cd1d1
	Ywhae	St3gal3
	D630039A03Rik	Setdb2
	Ncald	Zfp959
	Tapbp	5031425E22Rik
	Ssh2	Apaf1
	Runx3	Pld4
	Akirin1	Ypel5
	Cd7	Sp4
	Tgif1	Il1a
	Pianp	Nrip1
	Igbp1	Ankib1
	Dnajb13	AI837181
	Fth1	Gm43466
	Tmem70	C1qtnf12
	Psma4	Tcf7
	Prkab1	Stx18
	Mknk2	Gm36043
	Rbck1	Cbx4
	Abhd8	Gm15083
	Tlnrd1	Dot1l
	Raly	Fbxo44
	Serinc1	Neil1
	Traf3	Snx17
	Tprgl	Fam124b
	Nudt4	Ess2
	Yipf3	Slc38a9
	Orai1	Hyls1
	Bcl2a1b	Rab1a
	Hacd3	Cndp2
	H2-T23	Npc2
	Gadd45b	Lamp2
	Prpf38b	Tnfaip1
	Cytip	Slc35b1
	Zfp772	Ccnl1
	Kctd17	Slc9a5
	Pls1	3110001I22Rik
	Copb1	Prrt1
	Hnrnpk	Khdc4
	Atp6v0d1	Arl1
	Sec61a1	Pkn1
	Gramd1b	Stox1
	Csrnp1	Acer3
	Tkt	Bsdc1
	Tank	H2afy
	Sec23a	Abracl
	Kmt2b	Usf2
	Tab2	Gys1
	Setd5	Med25
	Gnas	Dennd1c
	Gna13	Nup54
	Cd3e	Erp44
	Gm35082	Hbp1
	Tspan14	Pim2
	Grk2	Hint2
	Luzp1	Atf7ip
	Sntb1	Itk
	Ubxn7	Ilk
	Npl	Ap2m1
	Ccnk	H2-Oa
	Sumf2	Tbl1x
	Nr4a2	Rfxap
	Ncoa1	Rbks
	Gzmd	Cnot6
	Kansl1	Gxylt1
	Nptn	Tmem29
	Eno1	C430042M11Rik
	Coro1a	Maml2
	Ammecr1l	Tbl3
	Usp1	Kpnb1
	Eif4a1	Fosl2
	Map2k2	Actr10
	Exph5	Ccdc6
	Prrc2c	Gm26724
	Psmc6	Tbkbp1
	Zbtb1	Fancf
	Cenpa	Abhd4
	Adora2a	Psmd10
	Rplp0	Ctnnbl1
	Anxa2	Ndst1
	Bcl3	Tbc1d14
	Gabrr1	Limd2
	Trpc1	Zfp1
	Slc37a2	Gm7030
	Ptms	Traj52
	Tle5	Dlst
	Hnrnpf	Gm38250
	S1pr4	Calr
	Adipor2	Tubb6
	Slc22a15	Taz
	Baz1a	Zfyve16
	Lalba	Naa15
	Ptprj	Siah1a
	Fam120a	Snx21
	Eea1	Terf1
	Gm15283	Igkv6-23
	Sla2	Srrm1
	Dazap1	Rpn1
	Trps1	Ripk1
	Luc7l2	Tubgcp3
	Atmin	Galnt14
	Rab4a	Gtf2b
	Vasp	Zfp236
	Cxcr6	Top2b
	Jak3	Trmt12
	Fam189b	Aamp
	Icos	Ambra1
	Rab21	Il1r2
	Mrm1	Fam129a
	Kmt2e	Pakap-1
	Galnt2	Nedd9
	Tpst2	Mbd5
	Prkce	Atp6ap1
	Rilpl2	Cpped1
	Ints11	Paxbp1
	Ctla4	Mib1
	Gtpbp2	Raet1e
	Flna	Afm
	Atp5b	Ddx6
	Satb1	Setd3
	Gna15	Ik
	Rhog	Yju2
	Alkbh5	Mgat4b
	Slco3a1	Zdhhc3
	Plek	Cct8
	Nfkbie	Mfsd14b
	Cib2	Coq2
	Gm4022	Itgb2
	Pbxip1	1810026B05Rik
	Ms4a6d	Mysm1
	Actn1	Mastl
	Heca	Brms1l
	Dock11	Card11
	Gjb2	Aff1
	Dusp5	Slc35d1
	Ipo7	Cmtm6
	Wnk1	Lrrc58
	Tmem109	Kif20b
	Nek7	Fbxo6
	Gm47015	Marcksl1
	Actr1a	Slc45a4
	Dusp4	Nup98
	Eif3e	Cd99l2
	Tnfrsf9	Dmtf1
	Apba3	Mtfr1l
	Atrnl1	Grb2
	Nvl	Erlin1
	Cul3	Srsf7
	Serpinb6b	Stim1
	Ptp4a2	Pwwp2a
	Il2ra	Ikzf1
	Bcl2a1d	Zfp260
	Golph3	Clpb
	Rnf43	Aspg
	Cyth4	Mroh2a
	Btbd9	Acsl5
	Phf20l1	Rbm15b
	Chp1	Lonrf1
	Gtdc1	Myo1g
	Nefh	P4hb
	Pde4d	Stag1
	Cd80	Ilf3
	Laptm5	Chmp1a
	Rab5a	Spry1
	Ttc39c	Rubcn
	Adipor1	Armc10
	Gpr132	Tmem165
	Morf4l2	Fasl
	Eif4e	Mvb12a
	Wls	Arl6ip1
	Spata13	Rad23b
	Trnt1	Sacm1l
	Tm7sf3	Atp11b
	Snx20	Rtn4
	Tubb5	Cep120
	Arih1	Slpi
	Tnfaip3	Adk
	Csf1	Usp47
	Lgals3bp	Naa10
	Kras	Samd8
	Edem1	Gm26917
	Plekha2	Cdc42se1
	Ncf4	Rnf111
	Sla	Asxl1
	Prkch	Dnajb9
	Tgfb1	Gm17606
	Nfatc1	Copa
	Elf4	Mia2
	Vps37b	Tnf
	Mgat2	Insig2
	Rab8b	Card6
	Rac1	Zfp598
	Sh3kbp1	Trim13
	Adam17	Ankrd39
	Thap12	Tjap1
	Mgst2	Agfg1
	Capza1	Tob2
	Ndfip1	Rab18
	Nfkbib	Izumo4
	Hadhb	4930455C13Rik
	Sh3rf1	Fam234a
	Pkp3	Marf1
	Smco4	Mkrn1
	Ndrg1	Acadvl
	Ubl3	Slc25a51
	Ppp2ca	Trim59
	Arf4	Gm34868
	Gnb1	Socs4
	Tinf2	Bcl2l13
	Ostf1	Hspa13
	Gzme	Spg21
	Cd6	Stip1
	Phlpp1	Cyb561a3
	Prkca	Txlng
	Itpr1	Ncoa2
	Tnfrsf1b	Mtx3
	Serpinb9	Dph1
	Eif4h	Numb
	Tulp4	Zcchc7
	Pim1	Rundc1
	March7	Gbp10
	Arpc3	Selenot
	Ccn4	Lemd2
	Hip1r	Gm12316
	Rngtt	Dctn4
	Osbpl3	Gls2
	Igkv1-110	Pou2f1
	Lmnb1	Gm9725
	Trbj2-4	Smc4
	Gls	Tpra1
	Crtc2	Cdk16
	P2ry10	Fam91a1
	Nab1	Mta2
	Rabgap1l	Serp1
	Irak2	Rabac1
	Eif3d	Fcsk
	Sdf2	Gga1
	Wac	Mtmr14
	Etv6	Arhgap21
	Lag3	Gm7247
	Slc9a3r1	Ptpn2
	Nmrk1	Fbxo28
	Hnrnpa1	Etfa
	Camk4	Necap2
	Crem	Zmym2
	Ogt	Irak1
	Zc3hav1	N4bp1
	Pon2	Zdhhc6
	Il12rb2	Kdm3b
	Serinc3	Pla2g15
	Snx9	Mta1
	Sik3	Macf1
	Akap13	Wdr61
	Dgat1	Tmem198b
	Perp	Tfg
	Fmnl1	Cox7a2l
	Ube2j1	Wbp11
	Arl5c	Crebbp
	Gorasp2	Atf6
	Dynll2	Grsf1
	Ube2d3	Agpat2
	Impa2	Xpo7
	Gdi2	Psma3
	Gnb4	Vapb
	Mapk1	Slc25a44
	Ccl5	Cxxc1
	Dock10	Lrp10
	Vps54	Ubqln1
	Mxd4	Vapa
	Ctdnep1	Snapin
	Tigit	Orai3
	Isy1	1700096K18Rik
	Tiprl	Hadha
	Mnd1	Zc3h15
	Tap2	Nus1
	Nr4a3	Ilkap
	Stat4	Mov10
	Akna	Mbtd1
	Penk	Tubb4b
	Ece1	Mob1b
	Icam1	Tbc1d9b
	Zeb1	Lmf2
	Lin54	Eps15
	H13	Rnf146
	Sf3b1	Nsmf
	Map3k1	Pura
	Trav17	Foxp4
	Gm11361	Uso1
	Gabpb1	Adprm
	Sdf4	Nktr
	Il18r1	Dvl2
	Atp10a	Slc35a2
	Cnbp	2010016I18Rik
	Ptbp1	Pum1
	Ramp3	Gatad1
	Tapbpl	Zfand3
	Map2k3	Gfod1
	Gzmf	Fkrp
	Rbl2	Rsrc2
	Man2a1	Ube4bos1
	Lck	Zfp451
	Ly75	Cand1
	Ighm	Klhl2
	Cd82	Rin3
	Trav1	Gm15956
	Cd44	Dnase1l1
	Themis	Csde1
	Tap1	Taf12
	Klrc3	Gm50063
	Foxo1	Ppat
	H2-Q7	Arfgef1
	Cmip	Inf2
	Zdhhc18	Csnk1g2
	Hnrnpl	2610021A01Rik
	Cntln	Creb3
	Gpr68	Cysltr2
	Arf1	Grid2
	Prickle2	Ttf1
	Fam110a	Isoc2b
	Gpr160	Dock7
	Traf4	Sos1
	Cfap77	Vgll4
	Aebp2	Ginm1
	Mif4gd	Wdr48
	Itgav	Whamm
	Trbj2-5	Ighv5-6
	Peli1	Gm28556
	Kdm2b	Prdm5
	Gpbp1	Pbrm1
	Ciapin1	Capn11
	Trav5-4	Arrb2
	Galnt18	Rnf31
	Myo10	Gm16573
	Ucp2	Rnh1
	Cd200	Naa16
	Sytl3	Gng2
	Glud1	Fbxo5
	Nfkb2	Stxbp2
	Cmtm7	Coro7
	Il21r	Spata2
	Lrch1	Wdr45
	Selplg	Usp12
	Tnfrsf4	Smchd1
	Plxnc1	Cpeb2
	Dazap2	Zfp414
	Serpinb6a	Clec16a
	Atp9a	Krr1
	Runx2	Tmc8
	Cd27	Gnpda2
	Tpm4	Cd300ld
	Eef1a1	Stx11
	Ppp1cc	Ascl4
	Jak2	Peak1
	Prss2	Rab5if
	Sh2d2a	Lztr1
	Kdm6b	Sidt2
	Hspa8	Stk26
	Atxn1	Lclat1
	Eif3h	Gm16286
	Tiam1	Msl2
	Il2rb	Utp3
	mt-Atp6	Trim11
	Sult2b1	Fam160a2
	Crbn	Myl12a
	Sqstm1	Gaa
	Ehd1	BC004004
	Tmem123	Zswim6
	Stk24	Wdr82
	Prkar1a	Trav6d-3
	Trgj1	Bnip3l
	Cblb	Nfatc2
	Rgs16	Zpr1
	Sdcbp2	Inpp4a
	Rps18	Zfp647
	Slc25a3	Cyc1
	Ets1	Scamp2
	Uhrf2	Rab12
	Ybx3	Gm49086
	Trbv13-3	Cdk6
	Gm8909	H2-Q2
	Pdcd1	Nedd1
	Stat3	Dnaaf2
	Klrc2	Nfs1
	Ly6k	Gm20406
	Cd247	Gimap8
	Gm20400	Chpf
	H2-Q4	Axin1
	Eef2	Ksr1
	Rora	Fcrla
	H2-Q6	Rnf8
	Gldc	Kif2a
	Trbj2-6	Rnf13
	Trbv13-1	Cacna1a
	Trav5-1	Pik3ca
	Trbv2	4930578N18Rik
	Creb3l2	Dyrk2
	Trbv12-2	Zfp790
	Trav6-1	Arhgef10
	Tcrg-V6	Actr3
	Trbv13-2	Ddi2
	Tcrg-C1	Phactr2
	Trav6-3	Txndc11
	Trav7-4	Pafah1b1
	Trbv14	Zdhhc1
